# Supplementary material for: Invited perspectives: A community perspective on natural hazards key challenges and the Sustainable Development Goals
Source: Copernicus journal article supplement (doi:10.5194/nhess-2022-55), 2022-02-23
Supplement: Supplementary file 1 [file NHESS_Questionnaire_3Feb2022.xlsx]

## Sheet: Database
This dataset is supplementary material to the paper:Šakić Trogrlić R, Donovan A, Malamud BD (2022) Invited perspective: A community perspective on natural hazards key challenges and the Sustainable Development Goals. In Submission to NHESS
The below data are the 350 responses to the NHESS 20th Anniversary Questionnaire (see Appendix A in the above paper) with names and institutions removed. We have interpreted the institutional type, country and region from the information given by the respondents for institution.
	QUESTION 1 (Q1): Top three scientific challenges currently facing out understanding of natural hazards? (Response of participants divided into three columns, one for each bullet point)			QUESTION 2 (Q2): Three broad step changes that should or could be done by the natural hazard community to address natural hazards in achieving the sustainable development goals? (Response of participants divided into three columns, one for each bullet point)			Information type (nine categories) we interpreted from institution response given by each participant.	Information we interpreted from institution response given by each participant.	Information we interpreted from institution response given by each participant.	Information given by participant.
ID	Q1 (Column 1)	Q1 (Column 2)	Q1 (Column 3)	Q2 (Column 1)	Q2 (Column 2)	Q2 (Column 3)	A. Institution Type (University, International or Governmental Organization, National Research Centre, Non-governmental organization)	B. Country	C. Region (Eastern Europe, Western Europe, South America, North America, Asia) Based on Standard Country or Area Codes for Statistical Use by United Nations	D. "Your job title (if you allow it to be used in quoted material) (e.g., Research Geophysicist Scientists, Professor of Hydrology, PhD Student in Atmospheric Sciences)."
1
2							University	Kazakhstan	Central Asia	Professor of Physics, Docror of Geophysics
3							International Research Centre		Europe	Senior Researcher
4							Governmental Organization	France	Western Europe	Research in slope instabilities
5
6							University	Croatia	Southern Europe	Professor emeritus
7							University	Spain	Southern Europe	Professor in ETSIAAB
8	Cold waves	Heat Waves	Extreme temperatures				University	France	Western Europe	Research scientist (climatology)
9	Proper forecasting methodologies.	Better cooperation with public authorities.	Communication							Researcher Geomorphology
10
11	Forecasting the hazard triggering and evolution,	Analysis of hazard at different scales strictly related each other,	Connecting the natural hazards each other				University	Italy	Southern Europe	Full professor
12	How to communicate better with the rest of non-academic stakeholders	Feasibility in rapid declining CO2 values using Carbon sequestration	Preparedness and their implementation
13	Development of monitoring technique of the Mt. Fuji	Development of monitoring technique of the Nankai trough earthquakes	Validating earthquake forecasting and precursor				University	Japan	Eastern Asia	Associate professor of earth science
14	Public administration and management of complex and dynamic events.	Cascading and overlapping events present challenges to traditional hazard planning.	Lack of policy experience and knowledge within the hazard community.				University	United States	Northern America	Associate Professor
15	Finding links between physical processes and statistical descriptions	"Infiltrate" policy to better influence decision making	Team-up with communicators (write grants together) so we can focus on research (we are not necessarily good communicators)				National Research Institute	Italy	Southern Europe	Researcher in atmospheric, climate and hydrology
16	How to communicate scientific information effectively in a sea of mis/disinformation;	How to get people to take action to protect themselves and the environment;	How to achieve social equity in protection from environmental hazards
17	Understand the pathways of adaptation to change, be it natural regimes or societal evolutions	Combine different scales (natural regimes and societal)	Qualify within an integrated perspective of management the impacts for all different actors (including non human)				National Research Institute	France	Western Europe	Researcher in natural hazard economics
18	Spatial quality and resolution of observed data (e.g., point observation water levels);	Our understanding of and ability to model feedbacks in coupled-human natural systems;	Statistical methods/synthesis of large datasets generated through HPC				University	United States	Northern America	Assistant Professor
19	I don't think we should expect to 'understand' natural hazards. So I will list what I think is the main challenge for predicting natural hazards and for resilience planning.	Non-stationarity. The historical and geological record for natural hazards has its problems, but it is current our best source of information about the exceedance probability curve. Non-stationarity makes it harder to map this record into a future exceedance probability curve, and also makes it hard to map the severity of an event into an assessment of harm.					University	United Kingdom	Northern Europe	Hon Professor of Mathematics
20	Introduction: In nature, phenomena occur that generate disasters, such as climate change, earthquakes, landslides and floods, among others. Caused by the increase in temperature in the atmosphere, the drift of the continents, the instability of soils, which are natural phenomena that offer a challenge to geologists, geophysicists and geoscientists in general. These phenomena can produce a disaste…	Challenge 1: Natural Hazard Assessment. Incorporate modern methodologies of uncertainty, artificial intelligence, finite elements and spectral elements to determine the variables and their maximum values, that is, to identify the specific hazard and its maximum value, using deterministic and probabilistic models. From a scientific perspective, return period – vs. - hazard curves are obtained or i…	Challenge 2: Choice of return period. The return period T should be understood more in probabilistic terms and not as the average recurrence time of an event, for example in an earthquake the maximum probable horizontal acceleration with value " ao ", T should be understood as a parameter defined as 1/p where p is the probability that the value of ao will be exceeded in a year, thus: p=P[a > ao ,…	Three steps are formulated to achieve the objectives.	1. Obtain an inventory of natural hazards and identify them in the sectors where sustainable projects are proposed. This step allows the increase of information and accessibility regarding natural hazards, based on this formulate projects that model possible damages produced by natural hazards.	2.The analysis of the return period curves and the hazard variable of each of the simulated scenarios. In such a way that each previously identified hazard can be discriminated.	University	Colombia	South America	Professor of the University of Quindio, QUIMBAYA research group, civil engineer, master in seismology.
21	Earthquake,	Hurricane,	Flooding,	SDG_1	SDG_6	SDG_12	Governmental Organization	China	Eastern Asia	Research fellow
22	Improve prediction if new large landslides circumstances,	Improve (for the general public) hazard culture and prevention,	Improve professional education	SDG_6	SDG_9	SDG_11				Geologist
23	The first challenge is the scientific development of predicting natural hazards	Scientific planning for how to avoid the effects of natural hazards	Study the future possibilities of natural hazards and how to deal with them	SDG_1	SDG_4	SDG_16	University	Egypt	Northern Africa	(A. Prof Ahmed M. S. Abd El Gawad, Geophysicist, A. Professor of Geophysics, Faculty of Science, Ain Shams University)
24	Global warming	Risk assessment	Resilience	Integration	Multidisciplinary	Worldwide strategy	University	Portugal	Southern Europe	Professor
25	Risk management,	Social impact of hazards		Social-economics analysis			University	Spain	Southern Europe	Professor of Mathematics
26	Making the science available to decision-makers,	Better monitoring of extreme events,	Proper downscaling of climate change effects to the regional//local level	Better communication			Governmental Organization	United States	Northern America	Oceanographer
27				SDG_1	SDG_4	SDG_17	National Research Institute	Italy	Southern Europe	Associate Senior Researcher
28	Predictability			Funding	Research	Implementation	University	Spain	Southern Europe	Agronomist scientist
29	Model empirical validation			Co-production of knowledge				France	Western Europe	Professor
30	Drought,	Flood,	Tsunami	SDG_6	SDG_4	SDG_13	Governmental Organization	China	Eastern Asia	Researcher Ocean Engineering
31	Landslide,	Desertification,	Tsunami	SDG_4	SDG_8	SDG_15
32	Changeful,	Complexity,	Compound	Prediction	Monitor	Management
33	Vulnerability changes in the past, present and future	Compound hazards and risks	Improving risk assessment in developing countries	I don't know			International Research Centre			Scientific Officer
34	The major challanges is not matter how researchers shows the risk, policy makers seems do pay much attention. This is a serious problem.			SDG_4	SDG_7	SDG_13	University	Ecuador	South America	Professor of Socioeconomics
35	Access to high precision digital data and installations near natural hazard sites;	Access to highly trained individuals in the digital world as well as earth sciences;	Standards in fast evolving methodologies	SDG_4	SDG_1	SDG_3	Governmental Organization	Canada	Northern America	Research scientist/geologist
36	New geometries of the sea currents flows following climate changes	Structural thickskin processes of the continental and oceanic crusts	Acquiring real numerical High Resolution datasets (time, resolution, precision...) on the earth characteristics (DTM, precipitation, currents...) and on any natural processes.	SDG_4	SDG_11	SDG_7	University	France	Western Europe	Pr Dr Eng
37	Volcanoes	Sandstorms	Wildfires	Awareness	Free-access	NRT access to data	National Research Institute	Belgium	Western Europe	Research Geophysicist Scientist
38	Continuous Monitoring	Mitigate	Education	International action	Income distribution	Decrease poverty (SDG_1)	University	Brazil	South America	Professor of Seismology
39	Earthquake,	Flood hazard	Fire	SDG_14	SDG_7	SDG_1	National Research Institute	France	Western Europe	Engineering geologist
40	Climate change and human activity			Multidisciplinary communicatio	Environmental protection	Data sharing	University	China	Eastern Asia	Professor of Engineering Geology
41	Relation between GLOFs and climate	Drought expansion	Climate extremes	Stop fossil fuel emissions			University	Belgium	Western Europe	Prof.
42	Deforestation,	Ground and surface water pollution,	Ocean pollution	Deforestation and urbanization problems			University	Turkey	Western Asia	Geophysicist Sciences, Assist. Prof. Dr. of Applied Geophysics, Electrical endElectrical-Electromagnetical methods, Natural Hazards and Environmental Sciences
43	Cognitive Constraints on the part of the general public			SDG_4	SDG_6	SDG_9	National Research Institute	Japan	Eastern Asia	Head, Sabo risk division
44	Water management	Infection disease control	Sediment management	SDG_11	SDG_13	SDG_15	University	Japan	Eastern Asia	Professor of Hydrology
45	Multiple hazards,	Effects of climate change on hazards,	Societal issues related to hazards	Communication	Monitoring	Stakeholders involvement	University	Italy	Southern Europe	Profeesor structural geology
46	Natural risk uncertainties	Natural hazards assessment on climate change scenarios	Application of natural risk analysis to practice	SDG_1	SDG_10	SDG_13	Governmental Organization	Spain	Southern Europe	Scientific Researcher
47	Space-time variability of the impacts produced by phenomena such as El Niño-Southern Oscillation;	Causative events discernment and hazard deduction from geological evidences such as coastal boulder fields;	Interaction between surface and groundwater resources in the frame of global change.	No Poverty (SDG_1);	Quality education (SDG_4);	Reduced Inequalities (SDG_10).	National Research Institute	Italy	Southern Europe	Researcher
48	Flood;	Earthquake;	Tsunami	Forecasting;	Warning system;	Protection measures	University	Greece	Southern Europe	Professor of Hydraulics, Hydrology and Hydraulic Structures
49	Climate Change,	Vulnerability Assessment,		Open source release of data.
50	Heat waves	Cold waves	Severe weather	Climate Action (SDG_13)	Reduced Inequalities (SDG_10)	Peace and justice (SDG_16)	University	France	Western Europe	research scientist, climatology
51	Long term datasets	Physical models	Open Data	Wide community awareness	Young people implication	Globalization	University	Romania	Eastern Europe	Associate Professor Geomorphology
52	Earthquake early warning systems	Earthquake shrot-term prediction	In-situ earthquake models	Sustainable development does not exist			University	Bulgaria	Eastern Europe	Proffessor in Geophysics
53	Business case behind adaptation	Multihazard multiinfrastructure impact assessment	Reducing uncertainties (and cascading uncertainties) in estimations	SDG_9	SDG_11	SDG_13	University	United Kingdom	Northern Europe	Lecturer
54	Parameterization of small scale processes including turbulence	Underestanding of weather phenomena over complex terrain	Development of "environmental models" including all the aspects of the water cycle	Multi disciplinary works	Knowledge transfer	Citizens engagement
55	Multi-risk,	Dynamic vulnerabilty		Promote systemic, multi-hazard and multi-risk thinking
56	Landslides and rockfalls	Soil erosion	Fluvial dynamics	Quality education (SDG_4)	Climate Action (SDG_13)	Sustainable Cities and Communities (SDG_11)	University	Italy	Southern Europe	PhD, Assistant Professor
57	Climate Change,	Natural Hazards,	Submarine Sustainability	Coastal hazards,	Draught severity,	Green transition	University	Portugal	Southern Europe	PhD student in Geology
58	Widlfires (self induced)	Flood	Drought	Prediction ;	Pre-warn ;	Educate people
59	Uncertainty in assessment;	Physic based simulations;	Multi-hazard analysis	Quality education (SDG_4);	Reduced inequality;	Climate Action (SDG_13)				Research Geophysicist Scientist
60	How NH affect international security and the geopolitical landscape			Resilience of entities,	Security of populations		International Research Centre			Researcher
61	Earthquakes prevision and the induced effects	Climate change and rainfall distribution change impact	Scientific knowledge diffusion on NH	Good Health (SDG_3)	Climate Action (SDG_13)	Partnerships for the goals	University	Italy	Southern Europe	Assistant Professor in Engineering Geology
62	Understanding and predicting the earthquakes and their effects	Understanding and predicting the mechanism of violent catastrophic meteorological phenomena.	High accuracy warning systems.	Sustainable Cities (SDG_11).	Clean waters (SDG_6)	Quality education (SDG_4)	National Research Institute	Greece	Southern Europe	Research Director
63	Drought,	Sea-surges,	Sea-level rise	Climate Action (SDG_13),	Reduced inequality,	Life on Land (SDG_15)	University	France	Western Europe	Professor of Physical Gography - climatology
64	Accuracy of the measured parameters of the hazards.	Pre- and Post- evolution of the impact (Monitoring)	New technologies	Diffusion of research results	Simpler approaches	More mathematical approach	University	Greece	Southern Europe	Prof of Geology
65	Climate change	Limits to vulnerability concept, despite many studies we are still vulnerable	More urban planification and less complex model	No Poverty (SDG_1)	Reduces inequalities	Sustainable Cities (SDG_11)				Research scientist in environment
66	In my opinon the most dangerous are the interactions betwen natural hazards and large cities. So, events like the following are the most dangerous phenomena that will affect the human society. :	Urban flash floods	Urban heat islands	SDG_3	SDG_6	SDG_15	Non-governmental Organization	Romania	Eastern Europe	PhD Expert
67				Full Professor, Hydraulic engineering Department, Georgian Technical University			University	Georgia	Western Asia	Emeritus -Professor, Hydraulic engineering Department
68	False news			Reduce population growth,	Sustainable harvest,	Promote vegan lifestyle	Governmental Organization	Norway	Northern Europe	Senior scientist (meteorology)
69	Landslides,	Earthquakes,	Tsunami	Climate Action (SDG_13),	Sustainability Cities and Communities,	Quality education (SDG_4)	University	Greece	Southern Europe	PhD student in GNSS
70	Drought	Biodiversity collapse	Compund events	Impact and action based forecasting	Early detection	Don't forget monitoring	National Research Institute	Switzerland	Western Europe	Team leader in Hydrology
71	Earthquakes and large cities	Large tsunamis	Drought and fresh water problem	Expand observatories	Support African countries	Develop solidarity	University	France	Western Europe	Professor in Earthquake Geology
72	High uncertainity	Observation records are short	Translation of hazards to impacts	More data sharing	Participation of stakeholders
73	Effects of climate change on the occurrence of natural hazards	Land use changes	Analysis of Big-Data	Sustainable solutions for risk mitigation	Climatic models
74	Lack of dust measurements (observations in-situ)	Forecast of rainfalls at a high-resolution	Identify hydrometeors (such as hail) in remote-sensing data and models	Climate Action (SDG_13)	Responsible Consumption and Production (SDG_12)	Sustainable Cities and Communities (SDG_11)
75	We ale living under anti science fakes.	Fake on global ecological crisis brakes development of rational use of natural resources.	Fake of global warming by human industry interferes scientific understanding of mode and tempo climate development.	SDG_1 Education	SDG_9 information	SDG_16 poverty	University	Russia	Eastern Europe	Professor
76	Timely forecasting extreme weather and climate events globally and timely inform the public	Decadal prediction of changes in frequency and intensity of weather and climate extremes given natural and anthropogenically forced climate variability	Keeping former scientific knowledge alive and new research feasible (with minimal technical and administrative overhead)	More education	More training	More system understanding	University	Germany	Western Europe	-
77	Earthquakes triggering	Landslides	Large volcanic eruptions	SDG_4. Quality education	SDG_10. Reduced inequalities	SDG_9. Industry, Innovation and infrastructure	National Research Centre	Germany	Western Europe	Research Geophysicist Scientist
78	The draft	Karstification	Desertification	To increase awareness	Funding of projects	Keeping sustainability	University	Iraq	Western Asia	Geologist Expert
79	Behavioural change.	Political will.	Understanding risk	Political will enhancement	Better use of the internet	Better educating children
80	Climate change,	Climate change,	Climate change	Gender Equality (SDG_5),	Zero emissions,	Consume better and vote green				Research scientist
81	GCM uncertainty.	Turbulence model accuracy.	Human behavior in response to countermeasures.	Convince politicians and the un(der)educated that science equals reality.
82	A poor understanding regarding the concepts of global warming, climate change and extreme events			Water quality and management;	Sustainable urban environments;	Responsible development	University	Portugal	Southern Europe	Professor and researcher in atmos sciences
83	Holocene boundary conditions,	Natural hazards in the context of Global Change,	Reconstrution of past hazards	Big data analyses,	Remote sensing approaches,	Integration of palaeodata	University	Germany	Western Europe	Professor in Physical Geography
84	Adapting hazard assessment to a non stationary context	Understanding climate variability	Exchanging information on damages from natural disasters	Adaptation measures to climate change	Reduction of vulnerability	Culture of risk	National Research Institute	France	Western Europe	Hydrologist
85	Data secrecy (obstacles in openness),	Lack of proper science communication	Lack of standardization in measurements.	Quality education (SDG_4),	Peace, Justice and Strong Institutions (SDG_16),	No Poverty (SDG_1)	University	Greece	Southern Europe	Research Associate, PhD
86	Impact of climate change on geohazards	Having early management tools to predict natural hazards.	Managing these hazards	Taking into account the three scientific challenges previously exposed.			University	Spain	Southern Europe	Doctor of Architecture, Professor of Building Structures and Geotechnics
87	Understanding the complexity of Pandermics.	How to integrate risks from natural hazards of different kind?	Limiting chances of a disaster caused by natural hazard event.	Learn basic sciences.	Listen and consider the alternative views.	Accept criticism.	National Research Centre	Russia	Eastern Europe	Expert, Chief scientist
88	Impact climate change in extreme events			A better understanding of the climate change mechanism impacting extremes			University	Spain	Southern Europe	Associate lecturer
89	Space based observations,	Early warning,	Risk mitigation	Invest in basic research,	Create services out of basic research,
90	Earthquake prediction,	Navier stokes equations analytical solution(s),	Navier stokes equations analytical solution(s),	Spend less time on social media and do some work
91	Earthquake Prediction,	Climate Change,	Green development	Disaster Risk Reduction	Quality education (SDG_4)	Sustainable Development	University	Greece	Southern Europe	Associate Professor of Seismology - Seismic Anisotropy
92	Increasing complexity of phenomena	Cascading effects	High speed and non-linear effects	Increase collaboration	Understand human factors (risk perception, management, etc)	Better address uncertainty	International Research Centre			Project Officer
93	Understanding links of cascading hazards	Advancing predictability	Forecast changes in future climate	Multidisciplinary research	Development of global systems for warning and mitigation procedures	Policy	University	United States	Northern America	Assistant Professor in Hydrology
94	Self-organized criticality of systems	Including the historical perspective (long-term records)	Definition and communication of risk	Sorry, no idea, the question is rather unclear to me			University	Germany	Western Europe	Professor of Geomorphology
95	Better understanding of climate change	Better understanding of the Earth as a complex system	Better understanding of Earth cycles at all scales	Improve Science communication	Improve awareness in communities	Increase outreach and media communication	National Research Institute	Italy	Southern Europe
96	Understanding and modelling changes and dynamics in vulnerability;	Social inequalities in climate/disaster impacts and management,	Development and assessment of ecosystem-based approaches to DRR/CCA	Provide the empirical basis for understanding the above-mentioned aspects
97	Effects of climate change on occurrence of natural hazards;	Reduction of water availability in soils;	Increase in concentrated rainfalls	Sustainable management of slopes;	Sustainable management in soils;	Reducing water stress
98	Bridging fundamental and applied areas of natural hazard research	Bridging academic and practitioner communities to improve research and practice	Redressing causes of "natural" hazards that include cultural understanding/practices, political (in)action, and public controversy	Connect with practitioners (e.g., NGOs) for applied projects and funding proposals						Assistant Professor of Technical Communication
99				Clean water and sanitization,	Affordable and Clean Energy (SDG_7),	Sustainable Cities and Communities (SDG_11).	University	Mexico	Central America	Associated Professor in Earth Sciences
100	Flash Floods	Severe storms	Heat waves	Scientific research	User communication	Education of General public regarding risks associated with natural hazards				research scientist
101	Sinking Deltas,	Shortage in freshwater,	Climate change	Better distribution of scientific results,	-Real interdisciplinary research,	-Focus on developing countries	University	Germany	Western Europe	Senior Scientist in Coastal Geology
102	Climate change,	Prediction and changes in weather extremes		Understanding changes in natural hazards,	Better communication to public and stake holders		National Research Centre	Spain	Southern Europe	Researcher
103	Interconnections betwenn different hazards;	Timely Operative earthquake forecasting;	Take policy makers into real,efficient action	Educate people on hazard self-protection;	Strengthen alliances promoting SDGs;	Promote online congresses	University	Spain	Southern Europe	Assoc. Professor Seismic Tisk
104	Remote sensing data and climate models at catchment scale,	Impacts of climate change on natural hazard risk and vulnerability,	Compound natural hazard events	Adaptation and mitigation strategies to climate change,	Increasing awareness,	Building resilient communities	University	Italy	Southern Europe	Professor of Hydrology
105	Data, their precision, their location in time and space and their completeness	Hypothesis made behind method of hazard assessment. Limit of validity and uncertainty.	Interaction between natural hazards	Clean water and Sanitation (SDG_6)	Affordable and Clean Energy (SDG_7)	Peace, Justice and Strong Institutions (SDG_16)	University	France	Western Europe	Engineer researcher - seismic hazard
106	Giant waves in Ocean	Wild forest fire	Sea-level rise and huge storms	Publicize the catastrophic consequences and grand challenges	Increase fundamental research activities	Develop engineering solutions		United States	Northern America	Senior research scientist in ocean science and engineering
107	Forecast of extreme events	Long term forecast of climate change	Development of resilience and mitigation measures against climatici exremes and changes	Change of fuels	Change in using raw materials and resources	Change in food (decreasing meat)	University	Italy	Southern Europe	Associate Professor in Coastal Engineering
108	The analysis of wind–structure interaction mechanism and its response；	Prediction of extreme weather events (such as the tornado); and	Accurate prediction of the earthquake.	Accurate monitoring;	Accurate prediction;	Efficient maintenance and management strategies.	University	China	Eastern Asia	Professor of Civil Engineering
109	Understanding why human societies are generally better developed at hazard prone areas (e.g. coasts, river deltas, mountain valleys)?	Transformation of risk/negative thinking to resilience/positive thinking.	Promoting research more on how human society coped/could cope with hazards, rather than how bad the hazards are/will be.	Transformation of risk/negative thinking to resilience/positive thinking.	Transformation of retreat-oriented solutions to upgrade-oriented solutions		University	Germany	Western Europe	Senior researcher of human geography
110	Flood,	Drought	Landslide	SDG_3. Good Health and Well-being;	SDG_4. Quality Education	SDG_6. Clean Water and Sanitation.	University	India	Southern Asia	Researcher
111	Earthquake Physics,	Earthquake Prediction,	Landslide and their prediction	Sustainable Cities and Communities (SDG_11),	Establishment of Gender Equality (SDG_5)	Elimination of poverty (SDG_1),	University	Greece	Southern Europe	Professor of Experimental Solid State Physics
112	Extreme draughts	Landslides	Overexplotaition of natural resources in low income countries.	Fight against poverty (SDG_1)	Work for sustainable communities	Work for sustainable industry (including mining)	University	Spain	Southern Europe	Professor of Geology (Petrology and Geochemistry)
113	Changes in disturbance regimes	Climate change and land use change	Compound disturbances (interaction between multiple hazards)	Data sharing	Multiple approaches (tools and scales)	Enhance the transfer of scientific results into concrete actions	University	Italy	Southern Europe	Professor of Natural Disturbance Ecology and Management
114	Predictability of small scale event	Predictability of hazard/risk of extreme event due to rarity	A complete picture of coupled hazard	More outreach effort is needed.	More interdisciplinary collaboration with other communities	More involvement into policy making
115	Earthquake	Volcanic eruption	Global Warming. In particular, I am interested in how global warming deforms the Earth, as a geodesist.	Quality of Education	Partnership for the Goals (SDG_17)	Sustainable Cities and Communities (SDG_11)	University	Japan	Eastern Asia	Associate Professor of Geophysics
116	Global warming	Field studies for vlidation of climate numerical modelling	Funding for research on all the aspect related to the global climate change	To work for reduction of natural hazard keeping in mind the sustainable development goals			National Research Centre	Italy	Southern Europe	Research Technologist
117	Dynamics and change (of the climate, but also of human and economic exposure)	Understanding coupled hazards and longer term patterns of hazard evolvement	Understanding exposure, loss and effective risk management	Develop insights for effective risk reduction of natural hazards	Develop sustainable and future proof infrastructure		University	The Netherlands	Western Europe	professor of hydraulic engneering
118	Drought,	Flood disaster,	Atmospheric changes	Good Health and Well-being (SDG_3),	Zero hunger (SDG_2),	Clean water and Sanitation (SDG_6),	University	Turkey	Western Asia	Professor of Environment and earth.
119	Extreme flood events	Climate change	Earthquakes	Community education,	Actions to reduce climate change,	Participation to the political life of each country	University	Italy	Southern Europe	Research Fellow
120	Non-stationarity	Climate change	Obtaining complete observation series	Free data sharing	Open meetings to public	Increase risk communication related to natural hazards	National Research Institute	Italy	Southern Europe	Research scientist
121	Prevision of earthquakes,	Prevision of landslides,	NH evolution in climate change	Teaching and investigating society resiliency,	Teaching and investigating non-structural NH remediations,	Focus on desertification risk	National Research Institute	Italy	Southern Europe	Post-doc research fellow
122	Overcome or incorporate uncertainties in data analysis	Identify compound events	Identify spatio-temporal pattern of extreme events	Research becomes publicly visible	Short term prediction of natural hazards becomes available	Further strengthen the interdisciplinary approach	National Research Institute	Germany	Western Europe
123	Uncertainty of climate change impacts	Feedback of geophysics system on climate change	Estimate probably maximum hazard	Protection again natural hazard with nonvictim solutions	Proper protection of crucial infrastructure	City development and natural hazard	International Organization			Professor of hydrology and water science
124	Complexity of multi-risk;	(A)synergies of DRR;	Modelling the spatial and temporal dynamics of risk	Continued cross-field collaboration;	Continued collaboration with emergency practitioners	With decision makers	National Research Institute	The Netherlands	Western Europe	Assistant Professor in Multi-Risk
125	Climate change and its influence on NH related processes	Interaction of NH and pandemic effects on population	Earth overpopulation and increase of vulnerability to NH	Improve the multidisciplinary approach	Improve dissemination and population involvement	Learn from the past to improve the future	National Research Institute	Italy	Southern Europe	Research scientist in geohazard monitoring
126	Lack of data - particularly high resolution bathymetry/topographic data.			Preparedness planning many events have to occur before policy makers and politicians will take action
127	The time of occurrence of hazards	The magnitude of those hazards	The duration of the events	The improvement of our knowledge	The information to the society	The development of our resilience against such hazards	University	Spain	Southern Europe	Emeritus professor of hydraulic engineering
128	Climate change and global warming	Coastal hazards from storms, hurricanes and typhoons	Infectious diseases	Reduce greenhouse gas emission	Enhance coastal defence	Better education and implement measures to reduce poverty (SDG_1)
129	Timely and accurate predictions are needed	Consequences of events affecting large areas should be reduced	Forecasting back swans	Disseminate scientifically-sound information to the general public	Multi-hazard assessment in large cities	Turning disasters into opportunities, i.e. building-back-better	University	Italy	Southern Europe	Professor of geotechnical engineering
130	-Climate change and natural hazard	-How to accommodate population growth and increased risk	-How to better qualify very rare risk	-Promoting development and use of low cost sensors	-Participating actively to definition of new satellites	-Promoting multidisciplinary studies
131	Nowcasting and Forecasting natural hazards in data scarce regions	Opensource data platforms to expand ideas beyond the scientific community	Timedependency of natural hazards	Genuine open data sharing	Investment in mitigation policies	Make sustainability economically feasible at all levels	University	United Kingdom	Northern Europe	Senior Lecturer in Structural and Earthquake Engineering
132	Climate variability: we use to talk about climate change, but this hazard sometimes is more relevant and requires more scientific research;	Floodings: this is a non stop seasonal hazard causing enormous economic losses in Central America;	Drownings: this phenomenum (372.000/year) is taken a unavoidable one but rather requires effective scientific results application.	Redefinition of all accountable decision making actors;	Bridging scientific community and decision makers;	Community capacity building.	University	Costa Rica	Central America	Physical Oceanographer part time researcher
133	Knowledge transfer,	Disaster expertise,	Risk awareness.	Science-policy interface,	Integration between disaster risk reduction and climate change adaptation policies,	Transboundary crises management across states	University	Greece	Southern Europe	Emeritus Professor/Hydraulics Works and Environmental management
134	Uncertainty of carbon emissions	Uncertainty of human adaptations	Climate change rapidness	Consumption habits must be changed	Use adaptive pathways to adjust to changes in uncertainties.	Lessen the Carbon foot print	University	Germany	Western Europe	Student
135	Modelling coevolution of hazard and socio-economic dynamics	Multiple hazard mapping	Chained effects of hazards	Better integration of hazard in urban planning	Involvement of local communities in addressing hazard	Fast and sustainable recovery mechanisms	University	Belgium	Western Europe	Professor of urban planning
136	Climate change (non-steady phenomena)	Understanding impacts (failures) on interconnected infrastructures	Sustainable adaptation	More interdisciplinarity and multi-disciplinarity	More relationship with stakeholders	More dialogue with decision makers to support decisions	University	Italy	Southern Europe	researcher in hydrology and flood risk
137	Forecasting natural hazards	Implementing mitigation strategies	Knowledge transfer between science and public	Sharing our knowledge with less developed countries	Implementing global early warning systems	Crowdsourcing using mobile devices	University	Germany	Western Europe	Professor of Engineering Geology
138	How does climate change influence weather patterns	If patterns change how do they influence natural hazards	Forecasting of mass movements	Increase forecasting/modelling capability for mass movements	Connect different forecasting models over different scales	Improve data assimilation for the models	International Organization	Austria	Western Europe	PhD in Snow Sciences
139	(Impact) model interoperability,	Investigate in cultural factors (in dealing with...),	Lack of detailed, georeferenced impact data for past events (also beyond dollars)	Define common model interfaces and APIs,	Invest in education and dialogue,	Deeply link DRR and adaptation communities	University	Switzerland	Western Europe	Professor for Weather and Climate Risks
140	Climate change impact on severe weather	Water quality challenges in changing climate	Health aspects on levels of mineral dust (desert storms etc) and wild fires	Steps against deforestation and desert spreading	Everybody's right to clean drinking water	Improved round networks to reduce dust emissions	Governmental Organization	Sweden	Northern Europe	Resarch scientist in meteorology
141	Our ability to predict weather events	Our ability to predict the behavior of the soil or material involved in the process	Our ability to predict the consequences of the process	Better management of occupations in urban areas	Active participation of communities in understanding the phenomena associated with disasters		University	Brazil	South America	Associated professor
142	Black Swan / Heavy tail events (not taken into account in statistics)	Insufficient data basis (not homogeneous in time and space)	Still lacking complete process understanding	Do research with the best conscience (Together)	Communicate to ALL (politicians, industry and society)	Interdisciplinary cooperation	University	Germany	Western Europe	Senior Scientist
143	Evaluation of predictions,	Uncertainty understanding,	The role of human action (not only climate)	Improve our understanding about the influence of human activity on natural hazards;	Climate Action (SDG_13);	Eduaction on natural hazards	University	Spain	Southern Europe	Professor of Geosciences
144	Predicting failure times for large landslides in remote regions.	Evolution of hazard dispositions in an increasingly ice-free world.		Increased sharing of results and technology.	Better synthesis of results and collaboration across cultural and language borders.		University	United States	Northern America	PhD Candidate in Geological Sciences
145	Develop longterm observations	Improve downscaling in order to tackle problems at the local level	Improve knowledge of local knowledge	Lobby funding agencies to increase funding towards long-term observations	Better consideration of local knowledge to propose solutions		National Research Institute	France	Western Europe	Researcher in geology
146	Framing and mapping geohazards in terms of awareness,	Monitoring hazard-related impact from space at high resolution,	Modeling the potential impact of interacting hazards.	Embedding geohazard knowledge in spatial planning and decision support,	Creating risk awareness and encouraging contingency planning,	Quantifying uncertainty.	Governmental Organization	The Netherlands	Western Europe	Coastal and marine geologist
147	How tropical cyclones will be affected by climate change;	Accurate simulations of tropical cyclones;	Dilemmas regarding reconstruction, build back better vs build back quick	Interdisciplinary research that addresses many SDGs simultaneously;	Fostering the free distribution of scientific knowledge;	Educating communities about the challenges faces	University	Japan	Eastern Asia	Professor of Coastal Engineering
148	Impacts of climate change on slope stability	How can we reduce risk when populations are increasing in areas vulnerable natural disasters (e.g. ocean shorelines)	Monitoring strain accumulation at depth in Earth’s crust	Promote global satellite-based remote sensing of slopes	Facilitate international landslide research programs	Promote public education in natural hazards and risk	University	Canada	Northern America	Emeritus Professor
149	The local occurrence probability/hazard curve (there are such only for few regions/perils),	Spatial dependence between local hazard, and	Accurate vulnerability functions (frequently, we forget the error in the predicting variable when regression models are applied)	Natural hazards should be communicated holistically.	Currently, single perils are exaggerated.	The estimation error should be also communicated.		Germany	Western Europe	Risk engineer/independent researcher
150	Data,	Integration of Physical and Social Sciences,	Climate Change	Adaptation to Climate Change at a Local Level,	Integration of biotic and abiotic systems,	Improved understanding of natural variability	University	Australia	Oceania
151	Effects of fire on rock-falls	Return periods of large earthquakes	Triggering effects of wildfires and climatic events on landslides	Properly recovery and management of geo-information	Better understanding of rock mass behavior	Developing widely-available cheap tools for risk assessment and management	University	Spain	Southern Europe	Professor of Rock Mechanics
152	Spatial and temporal change of marine induced hazards due to climate change	Adaptation against adverse effects of climate change	Structural and societal preparedness	Sharing the knowledge and experience for the progress in science for natural hazards	Resilience of coastal communities against natural hazards		University	Canada	Northern America	Prof. Dr.
153	Drought,	Floods,	Wildfires	Early prevention of droughts through weather forecasts for middle range	Preparation of alternative waterways and detntion basins	Improving the wildfiler control systems	University	Spain	Southern Europe	emeritus professor
154	Predicting intensity and location of auroral electrojets	Role of magnetic field in climate change	Role of solar outputs in climate change	Mitigation of technological systems for space weather	Break down national barriers to build global scientific partnerships	Conserve energy and develop renewable energy	Governmental Organization	United Kingdom	Northern Europe	Research Geophysicist
155	Insufficient funding,	Lack of continuous and high-quality measurements for some of the atmospheric variables,	Characterization of the measurement uncertainties	Define the priorities for next 10-20 years,	Concentrate resources to solve specific environmental problems,	Avoid duplicative efforts around the world
156	Sea level rise: how much and where (Spatiotemporal variation globally)	What are the impacts of extreme weather events and cascade events?	What are their impacts on food production?	Accurate mapping of impacted areas	Robust modeling constrained by the accurate mapping	Derive decision support information from the models	Governmental Organization	United States	Northern America	Geophysicist / Radar Scientist
157	Reasonable prediction of location	Reasonable prediction of timing	Early warning	Better integration of local communities into natural hazard assessments	Free access to more natural hazards data	Integrated early warning systems	University	Switzerland	Western Europe	Scientific Researcher
158	Understand Multi-Hazard Cascading Effects	Quantify impact on infrastructures	Develop concepts of adaptation	Enhance cooperation with Civil Protection and Policy Making	Foster interdisciplinary cooperation	Strengthen communication, cooperation and interaction with the public sector	National Research Centre	Germany	Western Europe	Research coordination and management
159	Understanding the frequency of extreme events	Combining hazard and vulnerability assessments	Fund raising	Closer links with decision-makers	Providing natural hazards' learning tools at school levels	Stronger support from academic institutions in this field	University	Italy	Southern Europe	Full Professor of Geomorphology
160	Forecasting and warning of floods	Forecasting and warning of earthquakes	Forecasting and warning of tsunamis	Interdisciplinary postgraduate studies on natural hazards -	Interdisciplinary research projects on natural hazards -	International cooperation of universities and research institutions.	University	Greece	Southern Europe	Professor Emeritus (Hydraulic Engineering)
161	Lack of public conscience about natural hazards risk	Failure of public authoritites to deal with risk issues	Failure of scientists to communicate with authorities and citizens	Improve communication quality and raise awareness	Increase climate change explanation and its risk relationship	Improve global partnerships in order to support sustainable development	University	Spain	Southern Europe	Researcher
162	Early warning of landslides and flashfloods	Improving the determination of thresholds tthat trigger landslides	The lack of data that limits our knwoledge of naturla disasters	Foster the development of filed observation in combination with modelling.	Improving international cooperation	Supporting educational initiatives for natural disaster preparedness	National Research Centre	Brazil	South America	scientist
163	Socio-economic impacts,	Understanding system resilience,	How to strengthen resilience	Link up with SDG_13,	Embrace SDG_17 (especially with private sector) to strengthen societal resilience,	Make all assessment models open-source and access.	University	Switzerland	Western Europe	Professor for Weather and Climate Risks
164	Parametric uncertainty	Climate change (different triggering events)	Policy making (transfer the scientific knowledge to the actual real world)	Find low-cost and reliable solution for natural hazard protection	Fight deforestation	Advice for re-location for most exposed communities rather than insisting with structural mitigations
165	Effects and non-effects of climate change	Improvement and availability of empirical data bases	Better prediction models, understanding uncertainties	Better understanding of what is implied by developmental sustainability	More emphasis on multidisciplinary in natural hazard research	Broader societal acceptance of natural hazard issues		Norway	Northern Europe	Retired seismologist
166	To predict the earthquakes and the volcanic activity.	Evolution of the chemical waste in the Nature.		To develop the Data Mining in real time.	To have very good fast and efficient instruments to answer to the natural emergencies.		University	Spain	Southern Europe	Professor of Applied Mathematics
167	The difficulty of explaining natural disasters with a single science and perspective	Transition from monotonous comprehension effort to multidimensional perspective (perception change of humanity)	Creating multidisciplinary models	Reaching everyone with a simple expression	To use social media effectively to reach young people and children	To create public pressure on government officials.
168	Accurate predictions of future changes in natural hazards due to a changing climate	The role of machine learning and its potential to improve current modeling frameworks	Climate-related migration	SDG_2 Improving seasonal drought prediction	SDG_13 Improve the simulation of hydro-meteorological extremes under climate change	SDG_16 Climate-related migration	National Research Centre	Italy	Southern Europe	Researcher
169	Early warning systems (EWS), their ability for correct/false alarms, and ways to improve.	Solution of the problem to short time earthquake prediction	Correlation between different natural hazards – deep geodynamics and external factors	Dissemination and education of population for the EWS and their abilities	Successful fight of epidemics – COVID, similar, etc.	Sustainability goals are an imagination.	University	Bulgaria	Eastern Europe	Professor in Geophysics
170	Describe the hydrological link between terestrial and aquatic systems quantitatively	Spatially distributed parametrization of models		Sustainable use of natural ressources (fisheries, agriculture, energy)	Improvement of water retention on land for urban areas	Improvement of water retention for agriculturally used land	Governmental Organization	Austria	Western Europe	Director
171	The nature of compound risk interaction,	Getting research to action (risk communication), and	Societal implications of natural hazards.	Understanding the mechanisms that drive societal impacts from natural hazards.	Incorporation of inequality and societal inequity in the considerations of risk.
172	To properly manage the big data coming from the sensors.	To properly apply numerical discrete element methods	To properly analyse instabilities and bifurcations	To apply artificial intelligence techniques	To simulate long runouts by ad hoc numerical methods	To take into account well founded instability criteria	University	France	Western Europe	Emeritus Professor
173	Global climate changes, their basic trends and perspectives.	Compilation of global databases.	Link between the traditional ans innovative research methods.	Compilation of the uniform global databases.	Education of experts in the field of NH study.	Communication between experts and public.	National Research Centre	Russia	Eastern Europe	Chef expert
174	Data mining and big data manipulation and exploitation for hazard assessment and forecast.	Understanding social processes related to hazard awareness.	Understanding of multihazard mechanisms of interacrion	Improve communication to broad audience	Help improving hazard forecasting and assessment capabilities of stakeholders	Getting more involved in the decision making process	University	Italy	Southern Europe	Associate professor
175	Effect of natural hazards on agricultural production and in general on human health	The possibility of forecasting natural hazards, allowing minimization of risks/damages	Definition of best practices (in urban management) to minimize damages due to natual hazards	Reduce the impact on agricultural production, to reduce hunger (SDG_2)	Reduce the impact of urbanization to minimize natural hazards related risks (SDG_11)		University	Italy	Southern Europe	Professor of Agricultural engineering
176				Develop comprehensive systems able to monitor the hazards at all scales	Gather timely and reliable datasets per hazards	Work with local/national relevant services/agencies capacity building	International Research Centre			Senior Researcher
177	Precipitation variability	Wildfires	Sea level rise	To convey the research results to the society.	To enhance studies on climate adaptation.	To educate younger generations by means of governmental programs.	University	Spain	Southern Europe	Professor of Physical Geography
178	Anticipation, prediction and uncertainty;	Process cascades;	Human role and human impact.	Provide clear crisis scenarios with quantitative assessments of likelihood;	Inform robust process and impact mitigation strategies;	Organize to create powerful and visible examples of best practice.	National Research Centre	Germany	Western Europe	Lead scientist, Earth surface dynamics
179	The difficulty to deal with/approach the time component (both over short and long terms) of natural hazards			Considering the spatioTEMPORAL components of natural hazards,	Modelling them in 4D,	Perceiving these components in a better way (using XR technology for interactive-collaborative immersion)	University	Belgium	Western Europe	Professor
180	Providing efficient and effective solutions for developing countries	Quantification of intensity/frequency due to climate change	Shifting from safety to risk	Education of researchers to more solution oriented thinking as typical for engineers	More collaboration to avoid redundant research	Less focus on ISI etc.				Research Engineer
181	Prediction in weather and seasonal scales	Simulation of coupled processes	Uncertainty (spread among models) of specific risks is too high in climate scales	More research focus on regions where scientific production is not intensive	Better connection between research and stakeholders	More efforts for public to be engaged to research	National Research Centre	Greece	Southern Europe	Full time researcher
182	Changes in length and severity of fire season.	Understanding dangerous interactions between fire and atmosphere	Extending accurate predictions of hazardous weather from 1-2 days to 3-5 days.	Increase accuracy and lead time of warnings of the most hazardous (top percentile) of conditions.	Understand complex interactions (fire-atmosphere-hydrology-soil-biosphere)	Warn on impacts as well as hazards.	Governmental Organization	Australia	Oceania	Senior Research Scientist
183	Understanding what aspects of hazards relate to their impact	Monitoring and predicting at the scale of the hazard	Relating predictable lead times to feasible protective actions	Systematically observe, record, exchange & archive hazard impacts worldwide	Systematically classify hierarchies of linked hazards	Establish a consistent methodology for valuing hazard information	Governmental Organization	United Kingdom	Northern Europe	Fellow in Weather Impacts
184	Education, engagement, and mitigation of climate change;	Freshwater supply availability and sustainability risks in a changing climate;	Better understanding of tsunami genesis from earthquakes and submarine mass failures	More public outreach and education at the level the engages the public;	Cooperating/working with communities at risk;	Improving our monitoring capabilities	University	United States	Northern America	Associate Professor of Geophysics
185	Effective awareness systems based on combined approaches between field-sensoring and modelling			No Poverty (SDG_1);	Climate Action (SDG_13);	Life on Land (SDG_15).	University	Spain	Southern Europe	Senior Lecturer of Physical Geography
186	The lack of high quality and reliable data on damage and its drivers;	The need of a multidisciplinary approach to handle, in a comprehensive way, with multifaceted problems;	The multi-scale nature (in space and time) of many hazard related problems	Increasing inclusion of local stakeholders (including population) in risks assessment and management,	Adopting a multidisciplinary/multi-hazards approach,	Supporting knowledge transfer towards underdeveloped countries	University	Italy	Southern Europe	Senior Researcher
187	Global sea level rise during climate change	Extreme events under climate change	Water security	Development of framework of modeling tools to address natural hazards	Availability of data for climate change	Provide arguments to connect extreme events to climate change	National Research Centre	Italy	Southern Europe	Oceanographer, Scientist
188	When and where (time/space) a natural hazard occur?	Natural Hazards chain reactions e.g. earthquakes to landslides.	Operational and customized Early Warning Systems.	More integration and collaboration between countries and researchers.	More applications of cutting-edge technology in developing countries.	More popular information about how natural hazards affect locally.	Governmental Organization	Cuba	Caribbean	Director of Geology
189	#NAME?			Better communications of the science behind natural hazards to the general public	Helping the general public to be better prepared themselves	Government/industrial parties better informed.	National Research Centre	Germany	Western Europe	Senior researcher/project manager
190	Draft, large parts in Asia will suffer from the draft	Tsunami, large coastal parts will suffer from tsunami, and	Earthquakes, especially those areas located along the boundaries of the tectonic plates.	Awareness of the people living in hazardous areas,	Performing more detailed studies in potential hazard areas, and	Increasing preparedness of actions to avoid natural hazards	University	Iraq	Western Asia	Ex- Geological Expert, Currently Lecturer
191	Uncertainty augmented by climate change;	Quantify the anthopic incidence in triggering "natural hazard" ;	Agree on the definition of hazard levels at not local scale (what's high, medium and low hazard)	Pushing for more applied research and looking for ways tu assure the continuity of the process initiated by a research project, once the project is over			Governmental Organization	Colombia	South America	President Antioquia Chapter
192	Improvements in prediction skill of natural hazards at lead times long enough to take mitigating action	Lack of understanding of existing prediction capability for natural hazards	The generation of large ensembles to improve the skill of predictions of natural hazards and better estimate risks	Better exploitation of existing prediction capability for natural hazards	Parsimonious end to end prediction systems for hazards with the minimum of complexity	Coordinated dissemination of real time warnings	University	United Kingdom	Northern Europe	Head of Long Range Prediction
193	Identification of hazards and their maximum value. Techniques for hazard assessment are expensive and therefore insufficient to be generalized across the earth.	Obtaining the return periods of the variable to construct the hazard curves. Based on data from many years of exposure to the hazard, forces to use another method to calculate it more rationally.	Vulnerability mitigation for the hazard. The cost of mitigation should be included in the financial year of the society for the return period.	Increase information, compatibility and accessibility on a global level about hazards.	Unify hazard criteria, normalize its language and variables.	Plan hazard assessment and mitigate vulnerability.				Civil Engineer MSc in Geophysics
194	Identification of hazards and their maximum value. Techniques for hazard assessment are expensive and therefore insufficient to be generalized across the earth.	Obtaining the return periods of the variable to construct the hazard curves. Based on data from many years of exposure to the hazard, forces to use another method to calculate it more rationally.	Vulnerability mitigation for the hazard. The cost of mitigation should be included in the financial year of the society for the return period.	Increase information, compatibility and accessibility on a global level about hazards.	Unify hazard criteria, normalize its language and variables.	Plan hazard assessment and mitigate vulnerability.	University	Colombia	South America	Researcher in seismic-tectonic and seismic hazard group Quimbaya
195	Uncertainty	Unavailability of reliable data	Lacking of a multi-hazard holistic approach	All infrastructure must be designed for risk resilience	More natural and sustainable solutions must be explored and should be demonstrated through research	Development should be in harmony with nature	University	India	Southern Asia	Assistant Professor
196	How much will natural hazards be intensified and be more frequent?			SDG_8: how to reduce the social vulnerability of low-income people	SDG_13: it directly relates to the frequency and intensity of natural hazards	SDG_17: partnerships among domestic and international stakeholders	University	Japan	Eastern Asia	Professor of Coastal Engineering
197	Uncertainty associated with natural hazards	Research linking disaster and development	Funding sources for natural hazards risk reduction	Research and practice on integrating DRR and sustainable development	Global and regional cooperation between state and non-state actors	Allocate funds and human resources to do research and implement programmes.	National Research Centre	Nepal	Southern Asia	Research Coordinator
198	Knowing recurrence period in rare events	Make sound risk evaluations and risk management decisions	Assess the impact of Climate Change on risk estimations	Communicate to society about the risks associated to natural hazards.	Promote nature-based solutions to mitigate hazards.	Perform acceptability analyses to decide the best risk management strategy.	University	Spain	Southern Europe	Senior postdoctoral researcher - Programme "Ramón y Cajal"
199	Improvement of physical models for effective data assimilation (especially remote sensing)	Multi hazard/multi risk probability modelling	Reliable quantification of impacts of climate changes at local scale	Increase the communication effort to promote a science-based increase in the awareness of the population regarding natural hazards	Establish fiduciary contacts with stakeholders and decision makers		University	Italy	Southern Europe	Associate Professor of Hydrology
200	Tsunami prediction	Tropical cyclone track prediction	Climate associated outbreak of vector borne diseases	Shifting from traditional energy to green energy	Enhancing the accuracy and types of initial data used for prediction of natural hazards	Enhancing the computational skill	University	India	Southern Asia	Professor of Oceanography
201	Robust quantification of uncertainties in many natural hazards	Widespread verification/falsification of models	Adequate communication of hazards and risk	Sustainable adequate planning of cities should be driven jointly by science and economy	Science must communicate in more effective way	Develop adequate procedures for science implementation
202	In the context of data analysis: detection of causality relationships;	Differentiate between anthropic and natural forcings	Working with multiple hazards with reflexive feedbacks	Improve geoenviromental data collection;	Improve geoenvironmental data analysis and modelling;	Communicating science with a good balance between scientific soundness and communication effectiveness, avoiding low level story-telling				Professor in Applied and Environmental Geology
203	Relations between climate change and increase in extreme natural events	Studies on the predictability of natural disasters	Mitigation of the danger linked to extreme natural events	Advocate a policy of reducing greenhouse gas emissions	Mitigate the anthropic impact on natural environments	Plan in a sustainable way the expansion of urban areas	University	Italy	Southern Europe	PhD in Geology (Urban Geology expert)
204	Lack of available AND accurate spatiotemporal data	Lack of processing the available data in the correct or needed way	Lack of proper interpretation of the data we have	Good quality papers over "need of publishing everything"	Avoid the support of institutions that have a strong bias (politically or ideologically driven)	Enhance the exchange of research	University	Germany	Western Europe	PhD student
205	The ability to numerically integrate small-scale processes into large-scale hazardous dynamics.	The compound impacts of climate change on natural hazards.	The reduced temporal and spatial resolution and extent of natural hazards observations.	Review conceptual understanding of natural hazards across spatial and temporal scales.	Consolidate modelling approaches.	Recognize more consistently the limitations and uncertainty in current understanding of natural hazards.	University	United Kingdom	Northern Europe	Lecturer in Physical Geography
206	Lack of knowledge for the links between multiple hazards or chain hazards	Complete time-series data from continuous monitoring for long periods when it comes to leave valises phenomena like landslides	Forward time prediction	Link to society needs for safer cities and communities	Establishment of multi-hazard chain links for infrastructure failure	Focus on the development of sustainable protection systems	Governmental Organization	Greece	Southern Europe	Civil Engineer, former Assistant Professor
207	Physical mechanisms of hazards, identidy vulnerable areas and people, EWS			Build cities resilient to natural disasters of climate nature, eradicate poverty as a strategy for building resiliency, create nby mena of education a perception of natural and socio-environmental disasters			National Research Centre	Brazil	South America	Climate and DRR scientist
208	Climate change and its impact on natural hazards	Natural hazards and migration	Urbanisation and natural hazards	Quality education (SDG_4) (education on natural hazards beyond classical subjects)	Zero hunger (SDG_2) (how do natural hazard threaten food security?)	Decent Work and Economic Growth (SDG_8) (natural hazard and sustainable development)	Governmental Organization	Norway	Northern Europe	Section leader Geohazards and Earth Observation
209	Quantitative evaluation of natural hazards-causing factors;	Process simulation of natural hazards;	Rapid and accurate evaluation and prediction of natural hazards susceptibility.	Quantitative analysis of the basic characteristics of natural hazards-causing factors;	Study on the mechanism and process of natural hazards;	Extension and simulation of research methods for natural hazards.	University	China	Eastern Asia	adjunct professor
210	Multi-hazard modeling approaches	Uncertainty treatment and communication	Strengthening and enriching monitoring frameworks and networks, continuous improvement of multi-disciplinary data quantity and quality	Accelerate the development and implementation of nature-based solutions	Improving strategies and tools for the communication and exchange with local communities	Use of "big data" in natural disaster management	University	Italy	Southern Europe	Associate Professor in Geophysics
211	Long term sustainable observation of climate system on global scale radiation balance;	Seamless prediction improvements of weather and climate and	The same for earthquakes and landslides	Application of Paris agreement in each country and globally,	Renewable energy production up to 70% until 2050;	Adaptation on climate change and earthquake conditions if necessary.	Governmental Organization	Croatia	Southern Europe	Researcher in Govermental Institution
212	More/better high spatial and temporal resolution observational and climate model data	Better data sharing and reproducibility, i.e. by publishing observational and model data in open-access repositories.	Better understanding of compound extremes	More studies (research funding) examining hazards in less developed countries/regions	Better collaboration with scientists from developing countries/regions	Better collaboration between scientists working on different types of natural hazards
213	Impact of climate change and human activities on natural processes and related hazards	Effective comunication and dissemination of information and early warning	Joint effects of physical phenomena and social factors in risk management	Publishing a smaller amount but higher quality scientific publications	Stimulating open access, open discussion, code and dataset sharing	Promoting an effective dissemination of scientific achievements into the society	University	Italy	Southern Europe	Researcher
214	Compound effects of earthquake and extreme precipitation on regional landslides.	How to quantify the impact of climate change on natural hazards.	How to quantify vulnerability of natural hazards to different types of elements at risk.	Provide detailed information to the public on natural hazards.	Conduct efficient study to support decision makers.	Provide scenarios for those unseen and unpredicted natural hazards (black swan phenomenon).	University	China	Eastern Asia	Associate Professor
215	The complexity of the earthquake mechanism makes it difficult to predict.	The complexity of multi-hazard is seldom known (e.g., hazard-chain of the East Japan Earthquake).	How changes in external driving factors (e.g., climate change) affect the occurrence of natural hazards?	Raise awareness of disaster risks.	Take effective engineering and non-engineering measures to avoid risks.	Enhance the ability to respond to disasters, e.g., evacuation from high risk areas.	University	China	Eastern Asia	Professor of Geography
216	Rise in Sea level - there are many factors that affect the rise in sea level, many of which are not fully understood. Also the impact of the rise in sea level is enormous and will affect millions of people.	Extensive drought - global warming and changes in atmospheric circulation could cause sever drought in some continents, leading to migration of millions of people.	Forest fires - the rise in temperature and the lack of water will increase the probability of forest fires	Better Quality education (SDG_4), especially in poor countries.	Clean water and Sanitation (SDG_6)	Life on Land (SDG_15) efficient use of our natural resources, reduce pollution and improve land use	University	Israel	Western Asia	Prof. (Emeritus) in Atmospheric Sciences
217	Seafloor observatories	Quick response research actions	Time series and precise chronology of geohazard events	Reorientation of geohazard research towards sustainable industry (e.g., renewable marine energy, ...)	Promotion of interdisciplinary approaches involving also social sciences	Integration of approaches among variable spatial and temporal scales
218	Unplanned urbanization	Conversion of fertile land for non agriculture purpose	Soil erosion and Desertification	Natural resource management on sound scientific basis	Strict policy interventions to stop conversion of fertile land	Soil and water should act as living entity entitled with living rights	University	India	Southern Asia	Scientist
219	Determinants of loss reducción ratio,	Drought seasonal Forecast,	From early warning sistems to action	Link Forecast to actions plans at global level,	Include stakeholders as end users when designing the DRM strategies,	Regional and global institutions responding to this specific issue.	University	Spain	Southern Europe	Professor in Environmental Economics
220	Better stochastic understanding of local extremes,	Understanding of spatial dependence/correlatins between local extremes,	The correponding link to physical determination of the hazard	A better modelling and estimation of natural hazard and risk would be the greatest contribution. The final response to hazard and risk is not task of science but of society.						Principal researcher
221	Understanding of nonlinear problems and processes	Development of fully nonlinear methods	Resist the temptation to replace human real intelligence by the fake artificial one.	Big cooperative projects on the research in natural hazards	Hire more experts in natural hazards at research institutions	Preparation of the future generation of experts by appropriate PhD programmes	University	France	Western Europe	Research scientist
222	Better quantitative knowledge of physical properties	Higher resolution subsurface imaging	Identificatin of threshold values and evolution of processes (needs more sophisticated coupled and integrated simulation)	Integrate onland and offshore research, e.g. with regards to drinking water or slope stability	Develop concepts for sustainable usage of resources	Providing scenarios for sustainable usage of the subsurface
223	Understanding of the causes of the ongoing Climate Change and real role of human activity in it.	Compilation of the uniform global databases of hazardous natural phenomena.	Interration between hazardois processes of different origin.	Paying more attention to the rare extreme events with long recurrence intervals.	Expanding catalogues considering past events (e.g. paleoseismology)	Understanding if we really need the sustainable development and what it really means.	National Research Centre	Russia	Eastern Europe	Chief expert
224	How to understand the relationship among different natural hazards；	How to explain the driving factors and their relative contributions of natural hazards；	How to view the differences between the predicted data and the observed data of natural hazards	Establish an open platform about natural hazards for reducing inequality；	Promote specific urban disaster study for building Sustainable Cities and Communities (SDG_11)；	Advocate nature-based measures to resist natural hazards for developing Climate Action (SDG_13)	University	China	Eastern Asia	Graduate Student in physical geography
225	Hydraulic and hydrogeological hazard in areas prone to river flood and bank erosion/breaching, leading to urban floods	Coastal flooding due to more frequent sea storms and sealevel rise	Salt water intrusion in estuarine regions and changes in fresh water supply	Reduction of greenhouse gases through renewable energy	Improvements in life style and recycling, with more attention to circular economy	Reduction of urbanization in sensitive areas (e.g. floodplains, coastal areas)	University	Italy	Southern Europe	Assistant Professor
226	Reliable threshold values with regard to activation of shallow landslides	Use of Remote Sensing Data (optical and SAR) with high repetition rate for identification of landslide prone areas	Hazard and risk situation with regard to floods and mass movements in a future warmer climate in mountain regions	More consideration of natural hazards in spatial planning and development	Use of innovative data sources and AI for generation of reliable planning basics	Better networking of the scientific community from different disciplines		Austria	Western Europe	Research Geologist Scientist
227	Challenge of the increase in intensity & frequency of NHs due to CC (climate change)	Protective measures and structures vs. possibilities of monitoring	Facing CC: building costs of needed new measures, maintenance costs of built measures vs. possibilities of monitoring, mitigation and early warning	Enhance mitigation to decrease vulnerability	Focus on endangered communities; support to increase resilience	Improve communication and understanding to raise awareness and confidence in science, measures and early warning systems	University	Germany	Western Europe	PhD student in remote sensing and landslide research
228	Climate change – An anomalous release of endogenous heat (occurring every 27.4 Ma) challenges humankind (great extinctions occurred on these occasions)	Fake science - overstating numerical models vs. objective observations, fashionable explanations, science/mass media relationship	Boycott of innovative ideas – impact factor like weapon for conservatism, anachronistic copyright regulation, obstacles for essential free circulation of ideas	Exploitation of the electrostatic energy of the atmosphere	Implementation of a planetary network to monitor real-time crustal stress propagation (acoustic emission)	Planetary monitoring of air-earth currents (by magnetic satellite modelling and others)		Italy	Southern Europe	Scientist (retired)
229	Economic impact	Applicability of prevention measures	Contribution of stakeholders in decision making	Visualisation of space and time developments	Protection of cultural heritage different from common buildings in mitigation measures	A zoom between the element scale in a building and the urban scale	University	Romania	Eastern Europe	scientific researcher
230	Non-stationarity of temporal natural hazards evolution. Impacts of climate change.	Proactive planning, management, policies, governance of natural hazards prevention, mitigation and assessment. Insurance issues.	Socio-economic issues of natural hazards. Societal perception of natural hazards.	Research of natural hazards in impoverished areas and third world countries	Study of natural hazards impacts on agricultural/food production systems, the environment and the society/economy	Education and public information dissemination	University	Greece	Southern Europe	Professor of Hydrology and Water Resources
231	Reliable measurements and monitoring	Validation of modelling	Changing land use by people	Providing hazard assessment for planning of infrastructure	Modelling potential areas affected by hazards	Apply methods tested in developed countries in developing countries in cooperation with the local authorities and science communities	National Research Centre	Switzerland	Western Europe	Senior Researcher
232	When and where will the earthquake happen, how strong will it be, and how much damage will it cause?			We would strive to increase investment in earthquake prediction research, improve the seismic performance of underground soil and above-ground structures, and quickly rescue after the earthquake to reduce casualties and property losses.			University	China	Eastern Asia	Associate professor, PhD in earthquake engineering
233	The impacts of climate change on natural hazards	The interactions between landuse changes and natural hazards	Improving forecasts and predictions	Dissemination of research results to favour good practices in the management of natural hazards	Expanding interdisciplinary research	When possible, shifting from structural to non-structural measures for the control of natural hazards	National Research Centre	Italy	Southern Europe	Researcher in hydrology / geomorphology
234	Characterisation of compound extremes (present-day & future);	Account for deep uncertainty in projections of oceano- hydro- meteo- climatic variables;	Attribution of impacts related to human activities.	Enhance sharing practices and feedbacks for managing uncertainty;	Converge toward a common framework for multihazard analysis under climate change;	Foster a common setting for detecting early warning signals of low-probability / high consequence events	Governmental Organization	France	Western Europe	Research Scientist (statistician)
235	Generation of nonseismic tsunamis (i.e. landslides and volcanic eruptions)	Interaction between wave characteristics (i.e. flow depth, flow velocity and hydrodynamic force) against coastal structures and buildings	Investigation/understanding of historical tsunamis using all available data (i.e. historical accounts, ground shaking data, tsunami trace, sand deposits, etc)	Improvement of real-time monitoring and warning making use of advanced ICT technology	Improvement of risk communication (both sender and receiver)	Improvement of risk assessment considering best knowledge of all existing uncertainties	University	Japan	Eastern Asia	Associate Professor
236	Given the fact that many of the current natural hazards can already be reasonably forecast, how can we utilize these forecast for societal preparedness and mitigation?	How to cope with sudden natural hazards (earthquakes, volcano eruptions) that are hard to forecast?	On a more physical base, how to deal with the complexity of interacting phenomena and how - in this complexity - to attribute certain effects to certain causes?	Open up to social sciences and integrate physical/natural sciences related understanding with social dynamics	Develop an understanding of local conditions affecting the SDGs	Develop options (if-then-scenarios) for decisions to be taken	University	Germany	Western Europe	Professor of numerical methods in geosciences
237	Climate change,	Landslide triggering and forecasting,	Monitoring and prediction of bedload transport	Common global open-access platform with state-of-the-art visualization and forecasting tools.	Global open data approach for monitoring (e.g., weather)	Education programmes on natural hazards and their mitigation, esp. in poor and remote regions	National Research Centre	Germany	Western Europe	Research scientist, section head
238	Understanding the Interaction & feedback between physical and social processes of natural hazards is essential			To understand the feedback between human and natural process, complexity science and advanced methods such as agent based models are needed	Combination of structural and non-structural measures are needed to achieve SDGs		University	United States	Northern America	Research Fellow
239	Assessment and understanding of cascading effects in multihazard and multirisk analyses	Application of interdisciplinary approaches for a better understanding of natural hazards	Improvement of the systemic understanding of climate change effects on natural hazards	Funding agencies should design ITTs more specifically on SDGs targets.	Specification of a quality corridor for input data for SD indicators	Communicate research results to the public by using the SDG framework	National Research Centre	Germany	Western Europe	Head of Research Group "Coasts and River Basins"
240	Assessing uncertainty in the use of natural environment modeling, too often based on instrumental data, with incomplete coverage of the appropriate time window	Find common language between natural sciences and engineering sciences	Really NATURAL hazards are few, we need to understand the human impact	There is no such a thing like "sustainable development goals", understanding this point is the major step we need; we need pathways to adapt societal needs to natural processes, liveability is the goal			University	Italy	Southern Europe	Professor of Geology
241	Climate change, this will allow us to better understand how to face with natural disasters as floods and prapare our inhabited areas to be resilient.	Water scarcity/demand. This is a very important challenge for future: several will be the realities that will face with this problem in future.	Sea level rise: all the world will be affected and we have to be prepared.	Population awareness: everyone need to know what is going on, an education conscious and og good quality is fundamental.	Responsible Consumption and Production (SDG_12), it will help in several other issues.	Sustainable Cities and Communities (SDG_11).	University	Italy	Southern Europe	Researcher in hydrogeology
242	How to incorporate the rapid anthropic- and climatic- induced changes into the risk assessment approaches	How to manage the lack of basic data or its poor quality to generate accurate and effective risk assessment approaches in areas highly exposed to natural hazards.	What tools and analytical improvements are required to effectively assess the dynamic of natural hazards in a highly changing environment.	Introduce new strategies and approaches to foster the implementation of nature-based solutions for facing natural hazards.	Incorporate effectively stakeholders and local communities in the monitoring of natural hazards and risk mitigation strategies.		University	Colombia	South America	Associate Professor
243	I can only speak about landslide hazards, which are the focus of my research in the last 20 years:	- Short term strength variations in soils and rocks: many types of landslides show changes in velocity at the time scale of years which are difficult to interpret and at the same time very critical for hazard and risk management	- Mechanisms of catastrophic slope failures: catastrophic slope failures are related to extremely rapid landslide motion, the underlaying conditions are manyfold and not clearly understood	Make earth observation data freely available to the broad community	Develop simple on-line tools for the broad community to process earth observation data	Improve predictive tools for natural and man-made landslide triggers	University	Switzerland	Western Europe	Professor in Engineering Geology
244	Extremes will get more important	Non-linear behaviour of processes will increase	Current modelling approaches will not be sufficient	Clearly identifying the Natural hazards aspect within each SDG	Providing evidence of natural hazards and its root causes	Suggesting to the different stakeholders different coping and adaptation strategies for the various natural hazards	University	Austria	Western Europe	Professor of Physical Geography
245	Limitations on the time period and spatial coverage of available datasets for some hazards	Lack of ability to accurately forecast many hazards	Physical processes for some hazards not entirely understood	Improved predictions of current and future hazards	Improved assessment of existing vulnerability of cities to hazards	Particular focus on hazards in vulnerable third world countries (a lot of hazard work is focused on the first world)		Australia	Oceania	Professor of Meteorology
246	-For rainfall related hazards, one key challenge is the uncertainty that climate change brings to the picture.	-Turning science into better planning and design; much science seems dislodged from this part of the process.		Reach out to not only government officials and policy makers but also affected communities in meaningful ways and not just through flybys that lack true engagement	Stronger links between social & earth science, and engineering		University	United States	Northern America	Associate Professor
247	Ambiguity of instantly positioning during some natural hazards.	Nonusing of early warning systems as actively and practically.	Lack of enough education to unconscious humans about natural hazards.	The natural danger community may encourage to researchers campaign and continuous GNSS measurement.	The natural danger community may support early warning systems.	The natural danger community may raise humans awareness through mass medium or social media.	University	Turkey	Western Asia	Research Geodesic Scientist
248	How to cope with low frequency high impact events in risk analysis.	The optimal use and improvement of alert technologies.	Employing advances in technology (cheaper sensors, transmission, computer power, artificial intelligence, etc.) in current hazard research.	Advance technology to build stronger structures in an affordable way.	Help authorities to build hazard maps in low income countries.	Convince people and authorities to know the hazard they are exposed in their communities.	University	Mexico	Central America	Senior Geophysics Researcher
249	Clear separation of competences; hazard scientists produce forecasts about how Nature will behave; decision-making needs additional and different competences.	Improve significantly frameworks to account for uncertainties of different kind in hazard forecasting.	A better understanding and quantification of multi-hazard.	Being more integrated in the whole decision-making chain, respecting competences of decision-makers.	Better understanding of the needs of the decision-makers.	Clarify better what we can and what we cannot provide to decision-makers.	University	Italy	Southern Europe	Professor of Natural Hazard Forecasting
250	Connecting 'big data' to the real physics of the phenomena	Funding (partially, reduction for some hazards expected (e.g. solid earth related ones vs. climate and overall vs. life sciences)	Overbuerocratizing of scientific collaborations (licensing, data management obligations, legal issues with data (IPR)...)	Connect detailed studies on specific phenomena with larger and broader views on human-environment (cyclic) feedback mechanisms	Open all environmental monitoring & observation data for everybody and any purpose as soon as possible after acquisition		University	Switzerland	Western Europe	Senior Scientist
251	Will climate change induce hurricanes in the South Atlantic? (Hurricane Catarina, March 2004; Tropical Storm IBA, March 2019).	When and where wet bulb temperatures will exceed 35 Cthe physiological limit of humansdue to global warming?	Many tipping points of the Earth system have been activated, e.g., Greenland ice sheets melting.	Nature-based solutions to increase resilience to natural hazards.	Long term planning of migration policies for coastal zones due to sea level rise.	Strong reduction of areas of risk to natural hazards for Sustainable Cities (SDG_11).	University	Brazil	South America	Senior Earth System Scientist
252	Meteorological related natural hazard and climate influence			Enhance hazard pure research (we need to know more!)	Enhance collaboration between different scientific communities, from hazard to risk	Population awareness and education on scientific hazards (not only follow the instructions, but understand the reasons)		Italy	Southern Europe	Scientist
253	Evidence for changing hazards under climate change;	Identifying effective and feasible adaptation strategies (beyond 'statistically effective');	More accurate risk assessment in data-poor areas (developing countries)	More actionable science linked to action and investment	More focus on providing robust and applicable research findings in low-data developing country environments	Better reporting of 'non sexy' findings (e.g. decrease of hazards under climate change)	International Organization			Disaster Risk Management Specialist
254	Global warming is considered to be the major challenge for world which stresses the ecosystem of earth by many ways.	Soil pollution results from contamination of soil by toxic materials which degrade the quality of soil.	The radioactive pollution due to release of radioactive substances into the environment.	Start a special edition dedicated to global warming problem and possible solutions.	Aware scientific communities and peoples with the consequence and their possible hazards.	Start and promote research related with radioactive pollution and related challenges,	University	India	Southern Asia	Associate Professor
255	Getting closer towards EQ prediction	Understanding cascading disaster effects	Developing disaster risk mitigation strategies	SDG_3: Support secure life conditions with strategies against natural disasters	SDG_11/SDG_13: Reduce impact of natural disasters due to climate change	SDG_15/SDG_17: Support secure life conditions by protection from natural disasters	National Research Centre	Germany	Western Europe	Science Manager
256	Erosion.	Coastal retreat.	Make those responsible for spatial planning understand our knowledge of natural processes so that they can apply it.	Give more importance to the knowledge of the geological environment in educational programs.	Make children aware of the danger associated with natural processes through education.	Work hard to disseminate our scientific knowledge and value the people who do it.	University	Spain	Southern Europe	Professor of Geologicial Hazards
257	Understand how slow-onset marine hazards (sea-level rise) affect rapid-onset hazards (tsunamis, storm surges, storm waves).	Improve our knonwledge of the extreme events in the geological recod in order to obtain a better frequency-magnitude relationship.	Understand how climate change is affecting fluvial systems and their extreme events.	Vulnerability and resilience should be considered in natural hazard research.	Developing countries need special attention when considering natural hazard research.	Special attention to more vulnerable areas such as arid environments and their exposure to extreme events.	University	Chile	South America	Researcher in Quaternary geosciences
258	Societal changes and community behaviour must be understood and incorporated as essential part of socio-natural hazards (never only natural)	Despite recent efforts, standardized data collection and sharing is essential to take the maximum out of already advanced methodologies	Rephrase the already concrete knowledge into appropriate and different language for young people, lay people, and decision-makers	Sustainability is all about continuation and perseverance; improve the maintenance and transfer of know-how	Development is not without coevolution; early identification of synergies and make a larger effort to prioritize joint works	Ever more approximate scientific and political communities	University	Germany	Western Europe	PhD Candidate
259	Pre-hazard mitigation to reduce harmful consequences	Communication during the hazard	Response to the hazard	-Development of coordinated infrastructure changes to mitigate future hazards and improve communication	-Moving toward coordinated international response to hazards, primarily aimed at saving lives, and allowing a more rapid normalization of activities	-Education of lawmakers, diplomats, and other policy makers
260	Bring climate change predictions to the local level	Elucidate the multidisciplinary connections between hazards	Quantify and, when possible, reduce uncertainty in natural hazard predictions	Address inequalities in natural hazard effects based on race, economics, or origin.	Take action on climate related pressures on ocean and terrestrial life.	Create strong partnerships between natural hazard scientists, managers and decision-makers, and the general public	Governmental Organization	United States	Northern America	Oceanographer
261	Understanding the cascading effects of disasters (effects delayed in time and at multiple spatial scales)	Integrating the human components in disaster risk assessment	Reducing hazards in aa context of multiple threats (e.g., floods+pandemic waves)	Testo di origine	Multi-disciplinarity, integrating natural and social sciences	Multi-actor approach, accounting for the human components (e.g., poverty, needs for arable lands, etc.) in mapping hazards	University	Poland	Eastern Europe	Associate Professor of Hydrology
262	Earth-Atmosphere interactions in complex, inhomogeneous terrain (understanding, modeling, data feeding those models)	Ensemble simulation of coupled systems at km-resolution or smaller (instabilities, coupling, triggering)	Measurement of 3d-thermodynamic fields @ high resolution (and reasonable cost)	SDG_1/SDG_2 'Weather Warning systems' (on the cell phone) developed/tested based on needs of affected countries	SDG_7: direct 'climate simulation community' towards more than Temp and Precip (the Nat Haz systems need more)	SDG_4: partnerships, not well-thought knowledge transfer	University	Austria	Western Europe	Professor of Atmospheric Dynamics
263	Monitoring and predicting flashfloods	Monitoring and predicting landlisdes & mudflows	Improving quantitative precipitation forecast in terms of lead times and spatial resolution	Reducing vulnerability to disasters in poor countries by improving disaster prediction tools, preparedness and proposing adaptation strategies	Minimizing hazards associated with climate extremes through structural and non-structural interventions	Increasing the awareness of the risk associated with climate change to promote mitigation
264	The rate at which sea level will rise.	The change in extreme weather due to climate change.	The effects of thawing permafrost.	Ensure communities are kept safe in their current location if possible and helped to move if necessary due to climate change.	Prioritise easy access to safe drinking water.	Ensure local communities understand the natural hazards that could affect them.	International Organization	Nepal	Southern Asia	Programme Co-ordinator for Cryosphere Initiative
265	Understanding of land-ocean-atmosphere-ionosphere coupling associated with Natural hazards	Lack of Early Warning system	Deployment of sensors to monitor different parameters associated with natural hazards	Inform people living in the area about all probable danger with the Natural Hazards	Inform people about the danger of Natural Hazards to existing Infrastructure	Monitor short and long term changes at local scale and likely Natural Hazards	University	United States	Northern America	Professor of Earth Science and Remote Sensing
266	Uncertain capacity of adaptation of plants to climate change and potential migration as a consequence	Timing of the tipping point	Uncertainty about the recovery potential of vegetation following increased fires in fire-prone areas	Bridging the gap between modelling and remote sensing communities by fostering comprehensive community studies	Bringing physical modelling and machine learning communities to work more closely together	Better incorporation of indigenous knowledge of the land to support modern science	University	Australia	Oceania	Associate Professor in Hydrology and Remote Sensing
267	How do they change in frequency and severity under climate change?	How do they impact society locall?	How do they (a single event as well as changing hazard patterns) impact global society as a whole, e.g. economically via supply chains?	Widen research on local adaptation	Widen research on structural adaptation (e.g. increasing resilience of the global economy by diversifying and strengthening local production)	Widen research on co-benefits of other SDGs that increase resilience against natural hazards (e.g. biodiversity)	National Research Institute	Germany	Western Europe	Post-doctoral researcher
268	Shifting patterns of precipitation and temperature over the globe and how we can prepare human life and activities for that.	Assess the change in frequency and magnitude of local hazards due to shifting weather patterns.	Improve the integration of hazard process models with time-series of earth observation images and information	Increase education and awareness of hazards and the time and space scales these processes act.	Improve collaboration between the western countries and the Lowand Middle Income countries which are hit hardest.	Improve our efforts to prepare communities for local hazards.	University	The Netherlands	Western Europe	Professor in Physical Geography
269	Disentangling the natural and anthropogenic components of natural hazards	Projecting plausible futures for the natural and anthropogenic components of natural hazards	Compiling longterm historical twoway interactions between society and natural hazards	Focusing on interactions of SDGs and not only on individual SDGs	Broadening the single natural hazard views to simultaneous/consecutive hazard view (catastrophe)	Identifying natural hazards or (combinations of) that may prevent reaching one or several SDG targets jointly	National Research Institute	France	Western Europe	Research Scientist in Hydroclimatology
270	How is Climate Change affecting the probability of rare events	How can we know that the probability distribution functions we are using are still accurate under climate change conditions	How can we provide insurance for currently not insurable risks?	Focus on risk and vulnerability for the poor segments of the population	Include hazards that mainly jeopardize food production, e.g. late frost, drought	Allow articles that deal with interplay of natural and social hazards, i.e. social unrest as consequences of natural hazards	International Private Organization	Austria	Western Europe	Director, Institute for Climate, Energy and Society
271	Earthquake prediction with some anticipation and reliability	To evaluate the real impact of climate change in the frequency and amplitude of major tropical and extra-tropical cyclones	To obtain better estimates of all mechanisms contributing to sea level rise under climate change	More interdisciplinary link between the meteorological and renewable energy research communities.	Increase participation of Climatologists and Mathematicians with Epidemiological teams to evaluate the impact of CC in all illness	Promotion of balanced gender representation at all levels of Academia	University	Portugal	Southern Europe	Professor of Cimatology
272	Earthquake forecasting;	Developing reliable scenarios of global warming;	Space weather and changes in the geomagnetic field forecasting.	Efficiently merging the experimental and naturalistic approaches in studying natural hazards;	Involving people in popular science activities for producing huge amount of reliable data;	Significantly lowering publication fees of Open Access articles for a global, democratic dissemination of scientific knowledge.	National Research Institute	Italy	Southern Europe	Researcher
273	Reliable evaluation of interaction among natural hazards.	Developing interdisciplinary/common methods for defining and recognizing extreme events related to different sources of hazard.		Improving the links and know-how transfer between disciplines dealing with natural hazard evaluation and social sciences.	Improving strategies to make policy makers aware of the importance of natural hazards knowledge for sustainable development.	Moving toward a generalized multi-hazard perspective for natural hazard description.	University	Italy	Southern Europe	Agg. prof. of Engineering Geology
274	Uncertainties with regard to climate change	Increasingly fraught geopoliticial situation that may influence governmental priorities from science / hinder collaboration	Dwindling interest in science in younger generations	Campaigning for greater scientific education focus at a younger age	Bringing natural hazards more into the mainstream showing how an event miles away might still affect Mr. and Mrs Smith in ANnormal town	Fostering more and more international collaborations	University	United Kingdom	Northern Europe	Associate Professor in Natural Hazards
275	Time sensitivity of our hazard assessments in a changing world	Understanding the (time and space) impact of natural disasters on hazards	Co-occurrence dynamics of multiple types of natural disasters	Highlight how a changing climate will affect (generally, increase) natural hazards, helping SDG_13	Develop assessments of impact of natural disasters on food production (SDG_2)	Develop better methods to assess urban natural hazards, especially in the tropics (SDG_11)	University	United States	Northern America	Associate professor, geomorphology
276	Understanding water-cycle dynamics in a changing environment.	Understand the hydrologic response to abrupt climate change over short time scales and to slowly varying natural climate change.	Establish linkages with practitioners in other disciplines.	Highly collaborate with social scientists and a wide variety of stakeholders.	Call for the protection of the natural ecological environment.	Work to understand, monitor, and model the relevant phenomena to predict long-term sustainability of the quantity and quality of flood.	University	China	Eastern Asia	Professor of Hydrology
277	Understanding water-cycle dynamics in a changing environment.	Understand the hydrologic response to abrupt climate change over short time scales and to slowly varying natural climate change.	Establish linkages with practitioners in other disciplines.	Highly collaborate with social scientists and a wide variety of stakeholders.	Call for the protection of the natural ecological environment.	Work to understand, monitor, and model the relevant phenomena to predict long-term sustainability of the quantity and quality of flood.	University	China	Eastern Asia	Professor of Hydrology
278	Interface between hydrodynamic modelling and damage modelling : which representative flow depth / flow velocity should be considered ?	Missing data and methods: data on openings in buildings (windows, doors) are critical for flood damage estimation, but hardly available	Assessing flow characteristics INSIDE buildings during urban flood is critical for flood damage estimation. How to do? With which data?	Take benefit of new, game-changing technologies to advance our modelling and understanding of floods.	Share, share, share ... data, methods, models, facilities, research outcomes!	Put even more efforts on outreach activities to turn scientific papers into practical outcomes for the benefit of all.	University	Belgium	Western Europe	Professor
279	Interdisciplinary analysis and correct communication	Multi-risk effects	Natur-based solutions to prevent natural hazards	Studies and research In line with the proposals in the previous point	Involvement of the civil society to create greater awareness of risks	Work on training and solutions, studies and results for risk and resilience assessment to support long-term multi-risk management strategies	University	Italy	Southern Europe	Professor of Hydraulic and Hydrology
280	Lack of sufficient observational data	Inadequate models due to both insufficient resolution and incomplete understanding of processes	A need for greater computational resources	We need to lobby for more funding for instrumentation, or pool resources and focus on specific hazards	We need to improve collaboration among modelers	We should have meetings focused on determining the best path forward to improve understanding of specific hazards	University	United States	Northern America	Professor of Meteorology
281	How compound events are triggered, how their dynamics as well as causative interrelations are better framed and finally understood?	How to improve our predictions about frequency and magnitudes of extreme events under (deep) uncertainty in order to estimate risks?	How to increase community resilience using risk dialogue to raise public awareness and by integrating active citizenship into this task?	Stronger integration of social science and modern technologies such as virtual reality when addressing NH issues.	Better cooperation of national platforms on DRR using networking .	Joint efforts to support development of cross-border (international) early warning systems for extreme compound events.	University	Slovenia	Southern Europe	Professor of Hydrology
282	Increasing model resolution while keeping computational costs	Understanding causal and physical connections of drivers	Understanding impact of climate change on extremes	More outreach taking our knowledge to policy makers, stakeholders, but also to the society	Become more environmentally friendly ourselves, e.g, taking the bike, going by train, virtual conferences, etc.	More cooperation/less competition between institutions, e.g., free data access, etc., to facilitate research	University	Germany	Western Europe	Post-Doc in atmospheric sciences
283	Changes in the permafrost environment and associated feedbacks as well as hazards	Improvement of projecting weather extrema	How to support governments (i.e. policies) in dealing with natural hazards.	Improving the understanding of the changes in hydrological cycle, including extreme precipitation, floods, role of the cryosphere, draughts, industry, water quality, etc.	Support education on natural hazards. The SDGs will only be reached if all people have access to education and water.		University	Canada	Northern America	Consulting Geotechnical Engineer
284	Integrated assessment models or coupled component models for natural hazard impact analyses in a changing climate	Use of new (geo-)data sources for understanding natural risks,	A complexity perspective on natural hazards and risks (feedbacks, time lags, adaptation, cascades of events, unintended consequences of policies, risk pathways)	Focusing research more on people in human-nature-relationship and not on processes only,	Focus on nature-based solutions and ecosystem services as solutions in natural hazards management,	Community efforts to create validated hazard and risk maps for highly populated but data-scarce regions	University	Switzerland	Western Europe
285	World population increase is the root cause of all future natural disasters			Increase wealth of rural and poor people so that they have less children	Get religions to agree that competing with each other by having more kids leads to natural disasters for all	Education on birth control and make birth control measures freely available for all	University	United States	Northern America	Professor
286	How to handle/incorporate uncertainty in analysis and communication	The impacts of compounding/co-occurring hazards	Disproportionate impacts on people from different socio-economic classes	Require data to be accompanied by margins of uncertainty for all results reported	Reject research that performs simplified analyses that make too many assumptions or disregard very critical objectives, unless very explicitly stated and modeled	Encourage more cross-disciplinary submissions and research projects (typically hard to publish!)				Research Asst. Professor
287	Compounding effects that in many cases intensify the impacts way beyond impact of each in isolation	Nonstationarity of hazards	Nonstationarity of vulnerability	Comprehensive assessments that take the nonlinear interaction between various hazards into account	Gathering comprehensive data sets that cover a broad range of hazard data with sufficient time-overlap to enable comprehensive causal relationship analysis	Developing tools and approaches suitable for nonstationary assessment of risk.	University	United States	Northern America	Assistant Professor, Department of Civil, Construction and Environmental Engineering
288	Coastal hazards reconstruct past, mitigate and adapt to future events through the understanding of onshore and also offshore dynamics.	Climate change and its impacts on major meteorological events especially the northernmost tracks of hurricanes.	Anthropogenic impact and its (re)adaptation to nature. Rebalance Mannature budget	Further international multi and interdisciplinary collaboration.	Dissemination to society. Increase presence on social media. Be part of school programs. Inform more in a more accessible way.	Long-term perspective on science development. Short-term projects and contracts constrain scientific development. Science knowledge is not indexed.	University	Portugal	Southern Europe	Auxiliary Professor; Coastal and Marine Geologist
289	As artificial inteligence is creeping into detection and warning of hazards there is the challenge to keep understanding how (the processes) this is done.	With rapid climate change characterization of probability with extreme value statistics (even dificult in near stable conditions but results are conveyable within certain margins also to the public) has to be changed to something else including the non-stationarity.	Interplay of multiple hazards	Make the risk assessment more even worldwide (while in the more developed region many risks from natural hazards are quite well known, in less developed places there is often at most only very basic knowledge)	Work better with social sciences and keep applicability in mind.		Governmental Organization	Germany	Western Europe	Head of sea ice and Baltic sea level service
290	Quantitative assessment of the hazard, i.e. observations which are both able to represent the phenomenon and quantitatively usable	Appropriate statistical treatment of the data (statistics for extremes used effectively and widely)	Interaction of several different components (with different modeling, methods, vocabulary, ...)	Work always with a combination of competences from different scientific communities	Put the impact of the hazard at the centre of the work, as a guidance to define the scientific goals	Measure the quality of actions/projects/tasks by the effect on the sustainable development goals	Governmental Organization	Germany	Western Europe	Research Scientist
291	Before you request the opinion of scientists and academicians, you should have respected and protected authors from the inexcusable, when the paper is not finally accepted, charge of their submitted papers. I know that this has been rectified, but it should have been rectified retrospectively.			Before you request the opinion of scientists and academicians, you should have respected and protected authors from the inexcusable, when the paper is not finally accepted, charge of their submitted papers. I know that this has been rectified, but it should have been rectified retrospectively.			University	Greece	Southern Europe	PROFESSOR OF ENVIRONMENTAL PHYSICS
292	Research funding is being diverted to 'science of disaster risk' - mostly in the social sciences.	New paradigm of 'understanding disaster risk' seems to be sidelining natural hazards from the debate.	Social science is taking over (hijacking?) discussion on 'drivers of disaster risk', often leaving out natural hazards.	Do a better job of convincing policy makers that continuing scientific work on natural hazards is needed for sustainable development we don't know everything yet about processes in hazardous locations.	Reinforce the notion that there are sustainable solutions in adapting to natural hazards.
293	Natural hazards affected by human activities	Future climate change scenarios, especially drought	Sea level rise & coastal hazards	Better understand and forecast of natural disasters that affect agriculture (achieve food security SDG_2)	Understanding multi-hazards related to future climate scenarios (combat climate change and its impacts SDG_13)	More focus needed on social injustice and natural hazards (SDG_1, SDG_5, SDG_10, SDG_16)	University	Italy	Southern Europe	Professor of Integrated Watershed Management
294	Understanding the consequences of climate change.	Understanding the link between the physical world and society (given poor data availability on impact etc).	Understanding connectivity between hazard risk (compound event, feedbacks, etc.)	Creation of open databases (to enable more people to analyse the same data, especially related to impact).	More focus on knowledge transfer to practice.	Focus on systems-based approaches using mechanistic models (so that we can do sensitivity analysis to understand opportunities for intervention)	University	Germany	Western Europe	Alexander van Humboldt Professor for the Analysis of Hydrologic Systems
295	Data – hazards are infrequent and often poorly observed – we need more measurement data to support understanding and models	Models – Lack of suitable modelling systems to link from fundamental process to impact.	Translation – research in improved translation to application and decision making is required to extract real benefit from wider research.	Increased integration of social sciences with physical sciences is required to improve communication and usability of natural hazard science.	Increased amount and valuing of multi-disciplinary research.	Systems approach to mapping the sciences, sources of error and gaps in the chain from fundamental processes though to impact.	Governmental Organization	United Kingdom	Northern Europe	Head of Atmospheric Dispersion andAir Quality
296	Cascade effects when various natural hazard processes interact (multihazard assessment)	Comprehensible and reproducible quantification of the hazard assessment and scenarios in the situation analysis	Linking numerical simulation results with expert assessments and their validation	Discussion and determination of acceptable risks for a society	Demonstration and explanation of correlations in the promotion or control of effects on natural hazard processes by human activities (e.g. biodiversity, water consumption, sustainable development, ...)	Realistically present future developments, e.g. attaching recent or historical comparative examples	National Research Institute	Switzerland	Western Europe
297	Wildfire behavior under extreme fire weather conditions and association with climate change	The future of extreme weather events as the planet warms	Climate change impacts on populations in vulnerable areas and respective feedbacks on the climate system	Replacement of fossil fuels by affordable renewable sources of energy (solar, wind, tides, etc)	Investment in low-income communities to reduce inequalities (education, sanitation)	Responsible Consumption and Production (SDG_12): less waste of food and electronics, investment in production of materials that are degradable (transition from plastic waste), investment in infrastructure	University	United States	Northern America	Professor Meteorology and Climate Sciences
298	High spatial resolution DEM and DTM for the Earth	High spatial and temporal resolution precipitation data and forecasts for the Earth	A missing link between the science and the policy/human behaviour (science-policy forum and behavioural social change communication)	Improve the science, also based on systematic and system approaches to validate the modelling/forecasting	Engaging with the administrators. In the agronomic sector the role of extensionist is to bridge agronomist and farmers. We need something similar	Transform scientific findings into educational material for the K12 sector	University	The Netherlands	Western Europe	Senior Lecturer in Earth Science and Remote Sensing
299	Due to climate change, an increase in natural hazards in the polar regions and the observation of their effects in the tropics,	Combining specialized modeling with geoinformation modeling, e.g. more precise hydrological modeling,	Effective means of protection against natural hazards, e.g. against changes in sea level.	Increasing awareness of the role of natural hazards in the life of societies, strengthening education on the causes of natural hazards at all school levels,	Taking activities to protect geodiversity and biodiversity,	Greater involvement of artificial intelligence, including machine learning, in predicting the occurrence of natural hazards.	University	Poland	Eastern Europe	Professor of geomorphology and geoinformation
300	Availability of good quality data over temporal and spatial scales for some hazards (e.g. landslides)	Insufficient/ inappropriate attribution of the hazard cascade and their impact in data catalogues (so was it the tropical cyclone or the landslide following the TC that caused the loss of life).	The effect of climate change on severity and occurrence of hazards	Greater practitioner and community engagement involvement	Remove silos of expertise, instead create teams of interdisciplinary working across the hazards to share best practice e.g. create an all hazards EWS rather than one hazard.	Better understanding and communication of anthropogenic factors that increase impacts from natural hazards
301	Lack of reliable information about historical and prehistorical frequencies and magnitudes of natural hazards and their management by humans.	Properly take into account local experience or traditional knowledge through all steps of hazard investigation and assessment.	Increasing political/ideological pressures which may prevent from publishing facts and results, which do not fit well into political/ideological assumptions recently seen as major or prevailing. Specific pressures may vary depending on places.	Better integrate local actors (communities, administrations, private owners/companies) through participative research into all steps of hazard research and assessment	Provide near-real time hazard mitigation products to broad public	“Natural hazards” are at the same time social and natural phenomena thus has to be investigated through interdisciplinary studies/works	University	Czech Republic	Eastern Europe	Researcher
302	In my opinion, one of such challenges should be focused in how hazard information is directly used in risk assessment (calculating risk). Actually there is some kind of break situation between both fields of knowledge.	Another challenge is how to improve the connection between hazard and risk assessment at legal level. In many places the situation is not clear and when both areas are separated (conducted by different groups), results are not always fine.	Finally, natural hazard assessment must improve its representation at digital level, instead of traditional printable hazard maps. In high risk areas, hazard maps are not enough for risk management so they should include much more information not directly related with the natural hazard. We should go forward, hazard maps should become in risk management maps.	Include other processes not directly related with the studied natural hazard, such us aquifer used, erosion, etc in order to understand what is happening in the area.	Study the role of human being in the environmental modifications and how they can affect to natural hazards.	Improve real multidisciplinary studies	Governmental Organization	Ecuador	South America	Risk Advisor
303	Face to the global change and its consequences	Adapting societal behaviors	Give the good information by quantifying hazard and risk (not only qualitative answers)	Acceptance that natural hazards cannot always be countered by more communications on this topics (tour, leaflet etc...)	Better prepare vulnerable communities with simple planning solutions based on natural based solutions	Better communication to stop/reduce mass tourism in vulnerable areas whose susceptibility to hazards increases with uncontrolled development.	Governmental Organization	France	Western Europe	Research Landslides Scientist
304	The complexity of cause of natural hazards,	There is no unique methods to map natural hazards	The lack of databases for natural hazards	Investigate natural hazard events where and when it is occurred as well as damages	Determine possible driving factors	Evaluate the spatial and temporal relationship between factors and natural hazards	University	Ethiopia	Africa	Lecturer and researcher of Geological Engineer
305	Finding new massive and cheap techniques to purify water for human consumption.	Propose sustainable methodologies for the recovery of areas with desertification.	Achieve a true form of communication between the scientific community and the population, to reduce the impact of natural phenomena.	Promote communication-education by the scientific community through social networks towards the population, as has been done during the pandemic.	2)Create a scientific forum by region worldwide, to work closely with governments to establish prevention strategies during crisis.	3)Promote the clean-water and sanitation research especially in developing countries, with massive but cheap techniques.	University	Mexico	Central America	Associate Professor
306	Integrate and fully exploit the big data coming from new sensor platforms, crowdsourced datasets and citizen science	Equalize differences in data availability across disciplines and Earth regions	Transfer acquired knowledge to endusers and policy makers effectively and seamlessly	Directly interact with policy makers and opinion-leaders to make SDG actually reachable (and understandable) to a broader audience	Improve the inter-disciplinarity of research groups but maintain funding to specialized, focused research	Promote citizen science as a fundamental data source and a way to actively get citizens into science and SDG	University	Italy	Southern Europe	Professor of Engineering Geology and Geohazards
307	Global understanding of landscape dynamics and river networks, how the imprint of small meteorological events conditions landscape response to large events.	Dynamic redesign of urban networks and occupation to improve flood resilience of cities.	Interaction and feedback between first (boundaries) and second order (i.e. vegetation growth) effects of climate change in river networks and landscape	Strengthening governance institutions with knowledge appropriation by joint development of implementation models integrating local culture and know how, which is essential.	Integrate the economy paradigm of exhaustible resources in the management of ecosystems services.	Educate professionals with the conscience that implementation fails and become inadequate, implying to change to probabilistic and adaptation paradigms.	University	The Netherlands	Western Europe	Professor of Hydraulic Engineering for River Basin Development
308	Many natural challenges are connected to clouds and the hydrological cycle, which is also connected with the greenhouse effect and the atmospheric circulation, so understanding these connections is one challenge.	Challenge in finding good ways to represent the natural hazards and good data describing their long-term state and trends.	Often natural hazards are random events possibly a result of several factors acting together, and one challenge is to find a sound statistical representation of these events (often, scientists underestimate the profound meaning of proper statistics).	Better risk mapping and prediction of natural hazards (SDG_1, SDG_2, SDG_6, SDG_7, SDG_8)	Better communication with society and leaders on climate change adaptation and mitigation.	Explain why better international cooperation can help dealing with large calamities and forced migration due to natural hazards (e.g. drought, changed hydrology, sea-level rise).	National Research Institute	Norway	Northern Europe	Senior scientist
309	Space-Time substitution in statistical characterization of Naturel Hazards			Quality education (SDG_4) to strengthen ability to counter pseudo science and conspiracy theories.	Clean water and Sanitation (SDG_6) to reduce requirements for avoidable interventions	Responsible Consumption and Production (SDG_12) to remove a key fundamental stressor on the natural world.
310	Focusing too much on individual hazards and not looking in to their compound nature	Knowledge gap between science and social science practitioners	Communication gap between science practitioners and laymen	Enhance knowledge sharing between practitioners of science and social science	Increase interaction between science-social science practitioners and focus/target groups of citizens	Build a knowledge base of 'the factors influencing the perceptions of people about increasing extremeness of events in the environment and the factors enabling people to define their adaptation strategies'	University	India	Southern Asia	PhD student in Economics
311	Accurate field-based observations/records are missing in many regions. There is a need to be connected to the field reality	There is a need to build robust baselines to tackle the impact of global change on hazard rates and patterns	Hazard events that are not extreme (in magnitude and/or impact) must also be investigated	Be in contact with local communities/stakeholders/scientists, capitalize on their experience and listen to their needs	Avoid working in isolation and get open to collaborate with various actors. Share data and knowledge, not only among research institutions	In the Global South, address long-term partnerships with the local institutions. Build capacity with that strategy in mind	National Research Centre	Belgium	Western Europe	Senior reseearch scientist
312	Lack of his historical data and description of hazardous events. Projections looks into the future based on few events recorded in the past. A thorough past event modelling should be the key to modelling the future.	Lack of the context and physical knowledge of the hazard events. Hazard events are not random and independent events. We need to understand what trigger them and the factors that are related to them in a holistic manner.	Lack of a consistent recommendations and best practices (i.e. data quality and models). A hazard assessment should not be constrained by limitations of flawed methodologies.	Understanding the assets, people and/or communities that hazards will affect.	Understanding the changes in the environment and the ecosystem of the hazards.	Understanding that hazard mitigation is a joint effort that comprises many actors and stakeholders. Their engagements is key to reduce the hazards vulnerability and increase the context resilience.	International Private Organization	Norway	Northern Europe	Innovation and Geospatial Lead
313	Bridge the scale gap between climate projections and actual impacts	Reduce uncertainty in climate projections and harmonize modeling approaches	Develop meaningful indicators that can guide effective measure implementation and verification	Research should be more concerned about the social and cultural inequalities that impair the implementation of manageable solutions.	Knowledge and data exchange should be significantly enhanced across a truly inter-disciplinary community including economic and social sciences.	The community should identify society as a whole as its main stakeholder and reinforce its ability to reorient political agendas.
314	Understanding the impact of changes in climate and land use on the occurrence of natural hazards	Reconciling the fact that theoretical work on extremes (i.e. Gumbel) began much earlier for floods and droughts than other natural hazards	A gross need for the application of "Hazard Function Theory" to the field of natural hazards.	Transfer of knowledge from extremely advanced field of flood frequency analysis to other natural hazards	Transfer of knowledge concerning "Hazard Function Theory" widely used in medicine and manufacturing, to the field of natural hazards.	Drawing parallels between earthquakes, landslides, floods, droughts, wind, and plant and animal extinctions (I have done alot of work in this area)	University	United States	Northern America	Professor Emeritus and Research Professor
315	Showing that science informs us of risks posed by extreme events that go beyond personal and organisational experience.	Effective public communication of those risks: the need for openness and transparency of research outputs	Encouraging holistic approaches to natural hazards, understanding the interconnectness of both the natural world and human activities	Ensuring that the impacts of natural hazards are assessed and mitigated when building new infrastructures (SDG_9)	Using our understanding of natural hazards as an engaging element in science education, one that can also enhance personal safety (SDG_4)	Sustaining and growing global scientific cooperation to share and advance understanding of natural hazards (SDG_17)	National Research Lab	United Kingdom	Northern Europe	Principal Consultant on Space Weather
316	Non-stationarity. Challenges of understanding a changing world (climate change, population growth, urbanisation)	Interconnectivity of natural hazards. E.g. landslides are linked to floods, many droughts have been seen to terminate in floods, etc.	Computing power: improves continuously, but large global simulations are limited by what is achievable with the computing power/storage available.	Interdisciplinarity: more collaboration between disciplines necessary to address the challenge of interconnectivity between natural hazards.	Focusing on vulnerability and impacts: study of natural hazards becomes relevant for society once vulnerability and impacts are factored in.	Study of adaptation in a changing world: study the efficiency of mitigation techniques in adapting to a changing world	National Research Centre	United Kingdom	Northern Europe	Drought Analyst
317	Integrating human-factors' feedback into some natural hazards (e.g. wildfires, biotic vegetation disturbances) to radically revise the modelling frame	Integrating hazard analysis into vulnerability/exposure analysis, as irreducible feedbacks exist for some natural hazards	Understanding if/when human factors may make unapplicable concepts such as return period, as prediction cannot rely on past trends	Including into focus the role of education gaps and social learning as key prevention factors for some natural hazards	Considering potential off-site cascading effects (affecting areas distant from where natural hazards are more likely) in critical development contexts	Understanding where climate change and natural-resource degradation may make pre-disaster conditions irreversibile (collapsing development sustainability)	University	Italy	Southern Europe
318	Account for cascading and interacting hazards	Probabilistic downscaling of hazard estimate to finer spatial resolution than the one available for controlling parameters	Quantify and account for temporal shift of probability distributions of event magnitudes, in relation to ongoing global change	Broadcast and explain the link between many hazards and global change to widen social pressure towards political changes.	Collaborate with social scientist to differentiate hazard based on socio-economic segment of the population, and highlight exposure inequalities.	Increase involvement with public policy maker to reduce risks at community level, and not only through individual insurances.	National Research Centre	France	Western Europe	Junior Researcher in Earth's surface processes
319	Effective multidisciplinary collaboration to develop/exploit the best available experimental, monitoring, computing and modelling technologies to understand processes and impact	Better understand and take into account humanenvironment interactions in natural hazard risk assessment and management	Develop risk mitigation/management solutions/strategies that fit in the local development, cultural, governance and environmental contexts	Focus more on knowledge/technology transfer and capacity development rather than imposing ‘advanced’ technologies to regions of different context	Develop effective mechanism to support multi-disciplinary and technical-nontechnical collaboration and knowledge-sharing to deal with complex problems, e.g. trans-boundary issues.	Better understand and take into account synergies and trade-offs between SDGs when developing hazard risk management strategies	University	United Kingdom	Northern Europe	Professor of Water Engineering
320	Data availability	Reconciling historical analyses with enhanced understandings	Understanding uncertainty	Highlight the concept of risk all mitigation measures leave residual risk rather than remove all risk as many communities believe	Science vs practice academic institutions need to recognise the benefits of practice as much as science, publications are an example	Multi-disciplinary activities are required may not be knowledge advancement in field but the application is	University	Australia	Oceania
321	Reduce climate warming	Prepare for sea level rise	Prepare for alternative mass food production and population relocation	Shift to green energy and reduce CO2 production	Prepare for temporary storage basins of riverine flood water to be released gradually after flood hydrograph peak ceased	Invest in production of alternative food such as via increase mariculture production, via higher natural cereals production and via synthetic meat production to reduce animals CO2 pollution		Israel	Western Asia	Retired Senior Scientist
322	Nonstationarity not only of physical drivers and processes, but also a variety of aspects related to vulnerability and exposure.	Integrated multirisk assessment including feedbacks, nonlinearities and the emerge of "acute" risk from "chronical/silent" processes	The complex interplays between sustainability, resilience, adaptation and transformation concepts, and the development of solutions in which these concepts coexist and and generate larger benefits to the communities.	To open up the disciplines towards a real integration so that the goals are addressed jointly rather than independently.	To strengthen the transferring of new knowledge through the formal education at K-12 level. Children are the future.	To connect in a strong and practical alliance the natural hazzard issues into landuse management and planning.	University	Chile	South America	Associated Professor in Civil Engineering
323	Firstly, we have to try to reduce entropy of the world. Almost all natural hazard are due to increased in entropy.	Secondly, entropy of bio mass and bio-food are negative. Emphasis should be given to use of these maximum to reduce entropy of world.	Thirdly, matters have positive entropy while life have negative. That's why life is self evolving. More and more use of material world causing more environmental disturbances causing natural hazards, climate change, hazardous diseases.	SDG_4: quality education, by quality education institutions could produce good human being, they can establish meritocracy in society and world peace.	SDG_7: Affordable and clean energy, control world health and make human sustainable development.	SDG_10: Reduce gender inequality (SDG_5), constant evolution of life only possible in universe by gender equality. If not equal one day whole universe will collapse.	University	India	Southern Asia	Professor
324	Assessment of multihazard risk (more than one hazard in a place, compound events, hazard chains)	Hazardsociety interaction (humanenvironment interaction)	CC and dynamics of natural hazards, change of underlying probabilities (e.g. of triggering events)	Promoting education for sustainable development under SDG_4 so that hazards will be better understandable by affected communities	Link to SDG_9 (building resilient infrastructure) so that scientific results will be better transferred into practice	Bridge the overall gap between science and practice so that multiple stakeholders better from scientific debates in the natural hazards community
325	Integration of (indigenous) knowwledge systems into assessment frameworks	Implementation and validation of qualitative data into quantitative assessments	MultiDimension (geospatial, time, social dimensions etc. (5D) ) Hazard assessments which can lead to understand effects and cascading effects of natural hazards	A common definition of hazards, their magnitudes and frequencies and interfaces, how data can be used in comparable assessment frameworks	More suitable (or standardized) communication methods to address especially local communities, stakeholders and decision makers	Generating a common understanding and modelling approaches of (potential) cascading effects, which accumulate before, during and after an event	University	Germany	Western Europe	Senior Scientist
326	Empirical validation of our models, especially on resilience and vulnerability	Not only DRR but risk and vulnerability creation, transfer, displacement	Linking risk perception and adaptive behaviour, especially for marginalized groups	Address risk and vulnerability creation, maladaptation, malpractice, malinvestment, wrong policies, risk or vulnerability or responsibility transfer	Advise caution when using models and indexes for high-stakes decision making until there is a more complete understanding of their validity	Further engage in Social Studies of DRR and CCA Science, production and usage of knowledge, maps and tools, science-policy connection	University	France	Western Europe	Professor
327	Lack of support in ongoing monitoring so clear "pre" and "post" data allow for full determination of hazard impacts. Too much speculation still exists.	Lack of financial support for preventative measures that would allow for reduction in cost impacts, which end up deferred until the hazard event has occurred (tree removal, elevated homes, secondary water sources, etc...).	Clear determination of differences between hazards and events. Many natural hazards are slow impacts over decades (not just climate change), but the focus is almost entirely on events (with the exception of climate research).	Closer work with social sciences to have a broader understanding of the human impact of hazards in the face of social inequity.	Working with insurances companies (instead of the current, more combative role) to drive access to insurance money for mitigation as opposed to response.	Spending more time determining how to communicate WITH stake-holders instead of AT stake-holder.	University	United States	Northern America	Assistant Professor
328	A better understanding of the interaction atmosphereocean	To improve the response of the society to natural hazards by a better social education	The application of models which run in a more realistic behaviour (small scale)	I think that all the points presented in the box are necessary. If I should choose three of them:	A better Quality education (SDG_4) can reduce most of them	The Gender Equality (SDG_5) is for sure necessary at it depends on the implication at all levels	Governmental Organization	Spain	Southern Europe	Remote sensing applied to Meteorology Scientist, PhD in Physics
329	Combining physical with societal impacts of natural hazards in a more holistic manner to be more useful for stakeholders.	The development of better methods to isolate the anthropogenic contribution to natural hazards.	Integrate observations and models in a more optimum way to improve shortterm forecasting of natural hazards.	To give the highest priority to study the physical and economical impacts of natural hazards to impoverished countries and areas (SDG_1/ SDG_2/SDG_3/SDG_10/SDG_15).	Increase the interdisciplinarity of research to analyse the impact of natural hazards on biodiversity (SDG_13/SDG_14/SDG_15).	Boost the collaboration with industry to design the suitable protection and mitigation structures to protect people against natural hazards (SDG_9/SDG_13)	University	Spain	Southern Europe	Researcher in Climate and Physical Oceanography
330	Address the impact of past and future climate change on natural hazards ;	Improve anticipation capabilities at all time and space scales on natural hazards, especially those driven by meteorological conditions ;	Develop scientific tools enabling impactbased ensemblebased forecasting at all scales	Move from hazard forecasting to impact-based forecasting (including at climate change time scales) and better integrate exposure and vulnerability components of risks, providing information better used for disaster risk reduction actions.	Meanwhile, keep progressing on the scientific understanding of physical phenomena underpinning natural hazards.	Better connect with social sciences and other knowledge holders, to better design and implement disaster reduction strategies.	National Research Centre	France	Western Europe	Research scientist, head of CNRM
331	Understand how natural hazards will change in the future in response to a climatic change	Constrain the uncertainty associated with future natural hazard predictions to an extent that policy makers & communities can act on our best understanding	Gain an appreciation that our current observations of natural hazards are in fact only a limited sample of possible hazards events under the current climate	Development of km-scale, fully coupled regional climate models will help communities understand the risks they face from climate change and associated hazards in areas with few observation networks	Translate our understanding of hazard risk into clear language that communities, policy makers and non-technical audiences understand	Reduce inequality in science by engaging and co-producing research with the people actually affected by the hazard	Governmental Organization	United Kingdom	Northern Europe	Senior Scientist, Climate Information for International Development
332	Integrated mulhazard assessment: simulteneous occurence landslides, debrisflows and flash floods, triggered by earth quakes or extreme rainfall	Complete lack of ground data for calibration of multihazards involving sediment and spatial connectivity (only airborne or satellite data available)	We need to rethink probability of recurrence of weather systems, and stop using oversimplified and outdated rainfall characterisation methods	Stop regarding each hazard as a monodisciplinary problem: flood experts, landslide experts, meteorologists, spatial planners etc. need to interact much more.	Stop claiming that our models 'automagically' provide useful and actionable information: check this with our stakeholders, what do they really heed?	Disasters are overarching, cause a setback in many SDGs. We need a better integration of SDGs with the Sendai framework.	University	The Netherlands	Western Europe	Prof. in Natural hazardds and Disaster Risk Management
333	How to reliably quantify the nonstationary change and interactions of natural hazards?	How to accurately quantify the uncertainties of natural disaster risks?	How to make optimal decisions considering the nonstationarity and deep uncertainty of natural hazards	To promote open data and open science (so much data has been locked away by many data holders and is very underused)	To promote better education in natural hazards at all levels of the society (e.g., citizen science; to make zoom meetings in the leaned societies available to wide audiences)	To promote transparent decision making by novel citizen engagement tools involving local communities in the hazard regions.	University	United Kingdom	Northern Europe	Professor of Hydroinformatics
334	We know enough about hazards and associated risks to mitigate most of them. Why are humans stil ignoring this knowledge and increase the risk by developing more and more exposed areas, instead of reducing the development in such areas?	Innovative nature based mitigation measures instead of concrete and steel	Less description of processes, more understanding of processes. Get the physicists and mathematicians into the natural hazard science.	Relate science to practice. What does your research contribute to solve natural hazard problems at hand?	Get out of the scientific bubble and have a look at real engineering problems. Help the problem owners, be specific and do not get lost in 1001 scientific hesitations.	In Europe: learn your host countries language and communicate with local authorities that manage natural hazards on their ground.
335	Nature-ness of NH to be measured across countries with common scale(s), as anthropogenic impacts are covered to foreign researchers.	Adversarial impacts exacerbated by global network are to be taken more seriously with reciprocity in mind, since dichotomy of direct or not gets more and more obsolete.	Relatively less known agents, such as solid particles in the atmosphere, micro/dissolved air bubbles in geo-sphere, etc. may be treated with common manner, to overcome interdisciplinary wall, silo effect among us.	SD has sounded comfortable for three decades, but conflict/ tension between the two terms warrant sincere attention. Simply put, not attainable unless harming either our current neighbors our future generations. Shortblind sightedness, consciously, sub-, or un-, the deterioration gets on our weakest as well as seemingly invincible “winners”, nerves, intestines, undeniably. Collapsology, the flip …			National Research Institute	Japan	Eastern Asia	Head, SABO, sediment-related disaster risk, research division
336	Nature vs. Social Response. How people understand and response to the natural phenomena.	Pandemics. Various unknown parameters and evolution of the COVID19 are one of the direct and indirect challenges we are facing.	Simultaneous disasters. While all countries facing the COVID19 situation, some countries encountered other natural hazards. It significantly impacted the disaster management of the countries.	By having the proper Business Continuity Management, it is possible to reduce long-term impact to the industries and communities. As a result, BCM can support the SDG_11 Sustainable cities and communities.	When the communities have high awareness of the natural hazards, it is likely to enhance SDG_13 Climate Action.	During the recovery phase and others from the meteorological/hydrological hazards, it is necessary to concern the ecosystem. Thus, it supports SDG_14 Life below water.	University	Thailand	Southeastern Asia	Assistant Professor of Industrial Engineering and Director of Risk and Disaster Management Program
337	The loss of soil diversity affects biodiversity, but we do not know much yet about soil biodiversity and its relationship with pedodiversity	Most people live in urban areas, many of them are affected by natural hazards like subsidence, we still do know much how to protect the ecosystem services of urban soils	Population growth implies more food from less agricultural soils; sustainable intensification of agriculture is based on local knowledge of soilplant relationships, which is still unknown	In general, SDG can be achieved with research activities more focused on society needs; basic research should be functional to the filling of knowledge gaps for the needs of the practice	The evaluation of researchers should be not only based on scientific papers, but also on the activities oriented toward the application of research to cope with natural hazards	Similarly, the time spent by scientists for working within societies dealing with natural hazards should be well acknowledged				senior research director
338	Extreme weather risk modeling:	Arctic Permafrost modeling: 1)Automated image analysis for Arctic Permafrost is a challenging problem in multiple domains over the arctic tundra regions. 2)Arctic storm extreme cold condition	Water demand modeling: 1)Water demand changes on a daily, monthly, and annual basis. 2)Demands change due to weather, season, and economics	Will future climate have an impact that increases water demands, or will conservation continue to drive down per capita demands?	Post-fire debris flows (DF) one of the most dangerous geo-hazards usually generated during heavy precipitation events on burned areas. Recent studies have shown that some of the significant debris-flow events occurred during the first post-fire storm season, demonstrating the necessity for developing short/long term plans for the mitigation of this hazard.	Design hydrological extremes, specifically Ai based floods and droughts monitoring system	University	United States	Northern America	Postdoctoral Fellow in hydrometeorology
339	Modelling the impact relies on databases that have to be updated more regularly (urbanisation, soil properties, vegetation cover, etc)	Natural hazards are more dangerous if people perceive them as imaginary or something that only affects 'others' (like in other country or far away) and then it is harder to get funding for more research.	Use of unconventional data sources for meteorological conditions analysis and forecast as well as verification is hampered by its perceived financial value.	Education of public, through modern means, issue picture books for young kids, make educational TikTok videos, educational posts on Instagram and other social media.	Prediction of natural hazards that result in hunger or destruction of infrastructure so that relief can be prepared and distributed as soon as possible, even made available in advance.	Provide guidelines on which activities can be done and in which way in all areas, fore example building housing higher above ground to accommodate periodic flooding or which crops to plant where.	Governmental Organization	Croatia	Southern Europe	Researcher
340	Communication and collaboration including with non scientists, communities, and economic sector	The compounding effects of natural hazards upon human systems, including economics, culture, and identity. Focus on INCLUSIVE science. Example: indigenous and other communities who know the most about local conditions on the ground and have the most to lose.	Shift emphasis from forecasting and modelling (exposure to harm) and move toward understanding sensitivity (potential to be harmed); define, explain, and quantify resiliency	More outreach to the incoming US administration-move FAST on this! The federal government must invest now in climate communication and collaboration, and it needs to be linked with pandemic communication.	Invest in diverse, inclusive, and ethical climate science. The face of climate science is mostly male, mostly white, mostly straight. Diverse scientists doing diverse science is key to unlocking innovation.	An interdisciplinary task force to devise an international strategy for sensitivity and dedicate a series of publications and websites to results and findings.	University	United States	Northern America	Archaeologist
341	Use a common language in the different scientific communities, including the natural sciences and the social sciences, about the factors into which we can decompose the natural risk.	To know the trends of natural hazards and the impact of climate change on them, disaggregating the causes.	Address natural risks as manifestations of a single complex ecosystem that requires systemic treatment.	Provide the knowledge to build risk management into legislative instruments and private activities, with a particular focus on cascading it down to basic services such as transport, power supplies, telecommunications, water supplies, sanitation, etc. [SDG_9, SDG_11, SDG_13].	Address the social factors involved in increasing the impact of natural hazards, influence public policies and improve risk awareness. [SDG_1, SDG_2, SDG_9, SDG_10, SDG_11].	Integrate in our studies the damages and benefits in ecosystems as a consequence of natural hazards, and their influence on the feedback processes of climate change [SDG_13, SDG_14, SDG_15].	University	Spain	Southern Europe	Professor of atmospheric sciences
342	Reducing the confirmation bias (everything goes worse) and dogmatism tendencies when treating the climate change issue	Integrate the tendency of over-modelling natural hazard phenomena (computer models) without a corresponding increase of effort in measuring the real phenomena in the field	Reduce the self-referentiality of the scientific community to foster a less emotional perception of science by lay people and activists	Move to a more ethical framework for science development and publishing, which in many countries mostly relies on bibliometrics and induces research to be short-term and not long-term and thus less deep (see goals “Quality education (SDG_4)”, “Decent Work (SDG_8)” and “Reduced Inequalities (SDG_10)”)	Reduce the confirmation bias (everything goes worse) and dogmatism tendencies when treating the climate change issue (see goal: “Quality education (SDG_4)” and “Climate Action (SDG_13)”)	Emphasize that understanding of and protection from natural hazards is crucial (a "win-win" strategy) for equitable and sustainable development regardless of the "climate change" issue (see goal: “Sustainable Cities and Communities (SDG_11)”)	University	Italy	Southern Europe
343	Understand to what degree specific natural hazards are increasing due to human-made climate change	Understand the trajectory of these potential increases under specific GHG emissions and associated warming scenarios	What preparedness and mitigation options exist (beyond tackling climate change) in reducing impacts of these hazards	Even closer cooperation between climate change and NH communities	Increase and refinement of attribution studies (linking climate change and natural hazards)	Providing very clear communication to the public and policy on (i) what we know with sufficient certainty to underpin management/mitigation decisions (ii) where there is currently too little known and hence more research needed to enable robust decision making. (N.B. its always better to know more and hence defer to more research, but we can do a better job as a community to send out clear messag…	University	United Kingdom	Northern Europe	Professor of Wildfire Science
344	Met Office Data. Finer resolution, quicker publication, better and longer forecasting.	Lack of data sharing between organisations. Utilities have become too individualistic and dogmatic.	Lack of production and application of national models. Government Regulators too readily accept multitudes of models all trying to achieve a similar outcome for asset management.	National weather data needs to be more current in availability, more affordable for use and more local for application. Forecasting to improve for 15+ days in advance.	Organisations appear afraid of asset failure even though failure is the natural end to an assets life. Too often asset groups are small for critical assets. Being open and sharing will improve this and the models.	Lack of realization that one failure often leads to another on the same asset as well as significantly increasing the failure risk to adjacent assets of other organisations. Streetworks data should be more readily shared.		United Kingdom	Northern Europe	Performance and Maintenance Manager
345	Natural hazards are by nature multi-disciplinary (mathematics, ocean, atmosphere, geology, social sciences, etc.). Making these different communities speak the same language and work together is a top scientific challenge.	Uncertainty is a major component in studying natural hazards. Better uncertainty quantification is another top scientific challenge in natural hazard assessments.	As a numerical modeler, improving the physics of the models instead of assimilating more and more data is in my personal opinion the last top scientific challenge for understanding natural hazards.	Convincing governments and policy makers of funding research projects and maintaining the founding for operational tools within universities or agencies despite no obvious short-term rewards is a step towards sustainability.	Sustainability in the poorest countries also requires to design cost effective tools that can be used despite for example not having access to supercomputing facilities.	Better communication with the general public is also an important step for sustainability. Natural hazards have major consequences on the worldwide populations but too often the general public does not trust scientists because of the failure of our forecast tools for example.	University	Croatia	Southern Europe	Research Associate in Coastal Hazard Modelling
346	MARINE HAZARDS - Oxygen is essential for life, and the oceans are a major contributor of oxygen to the earth's atmosphere. A decline in the health of the seas and oceans due to pollution, overexploitation, and climate change impacts undermine the services they provide. The need to invest in effective monitoring and control procedures is increasingly urgent.	COASTAL HAZARDS - As long as sea level continues to rise in response to global warming, increasing the height and resilience of hard coastal defences will not ensure the protection of urban areas and territory for many years. Ecofriendly solutions to preserve ecosystems and to address coastal processes as an alternative to traditional coastal protection structures is becoming increasingly importa…	SOCIOECONOMIC HAZARDS - Human livelihoods will be affected by the chain effects of climate change, which will inevitably lead to irreversible conditions of unsustainability, especially in the second half of this century. Therefore, it is of utmost importance to act proactively, foreseeing, planning and reducing the risks of disasters, in order to more effectively protect cultural heritage, socioe…	EDUCATION It is imperative and urgent to promote the incorporation of knowledge about disaster risk, including prevention, mitigation, preparedness, response, recovery, and rehabilitation, into formal and non-formal education, civic education at all levels, and vocational training.	INTEGRATION The prevention and reduction of exposure to hazards and vulnerability to disasters, as well as an increase in readiness for response and recovery, are achieved with the implementation of integrated economic, structural, legal, social, cultural, educational, environmental, technological, political, and institutional measures.	ADAPTATION Development measures that address the urgent need to transform human behavior into sustainable practices and taking action to preserve coastal ecosystems and resilient seas and oceans should be implemented.	University	Portugal	Southern Europe	Associate Professor
347	Ensuring that our risk and natural hazards science is led by the needs of communities, in partnership with communities, while also leaving space for blue skies research where novel solutions can be incidentally found.	Uncertainty: becoming tolerant of uncertainty, and advancing all stakeholders and scientists uncertainty tolerance.	Adequately assessing our uncertainty in models, propagating uncertainty across complex interdependent models, and then communicating uncertainty in a tailored and appropriate manner.	Partnering more adequately with social sciences. Too often communication researchers and social scientists are included in large grants in an "outreach" role, yet social sciences can add SO much more to solving our natural hazards challenges, through the ground break research it can also conduct.	More adequately communicating and partnering research across disciplines: climate change, disaster research, and natural hazard phenomena research are still operating in silos. This is holding us all back.	Funding more mid-career research projects, at this point people are reaching peak skill and expertise and yet they can not dedicate as much time to do research due to competing demands. This will also help the career pipeline issues: the loss post-PhD / early career.	University	New Zealand	Oceania	Senior Lecturer in Disaster Risk
348	To answer your question, I have to define what means "natural hazards" (the term, which is used by many geoscientists in a narrow scientific sense). According to the document adopted by the UN General Assembly in 2017 (https://www.undrr.org/terminology/hazard), "natural hazards are natural processes and phenomena that may cause loss of life, injury or other health impacts, property damage, social…	Consider earthquake hazard science (closer to my field of knowledge) as only one of many natural hazards. We do not know: When rupture starts? When it stops? How to reduce uncertainties in earthquake forecasting? How to assess promptly the energy release and earthquake's magnitude to warn population? How to assess promptly and with a high accuracy earthquake's intensity, if the knowledge of site …	Meanwhile natural hazards community should move from only natural hazards research to disaster science (e.g., as mentioned by Ismail-Zadeh et al. (Nat. Haz., 2017). Only in this way we can understand IMPORTANT CHALLENGES SCIENTISTS FACES IN UNDERSTANDING DISASTER RISK REDUCTION (the most important issue compared to natural hazards only).	Keeping the above definition and societal impact, three broad steps by the community could be (based on Ismail-Zadeh et al. 2017):	SCIENCE Moving from disciplinary and multi-disciplinary research in natural hazards toward interand transdisciplinary science for disaster risk reduction by integrating knowledge across disciplines and stakeholders.	PERCEPTION Understanding that disasters associated with natural hazard events are not natural but social phenomena. Even though we know well when earthquake will start and stop, this knowledge is a little to save lives or prevent damage of infrastructure, if vulnerability is high and capacity is low.	University	Germany	Western Europe
349	A greater emphasis on high quality science	Improved visibility of (quality) science and sharing of (quality) information between scientists	Greater and more consistent collating of hazard information around the world	Disseminate our information better and encourage more scientists to work in and with the government to ensure science makes it into policy	Using market forces (e.g. insurance, publicly visible hazard information) to help encourage changes in risk exposure.	Identify connections between different sustainable development goals such as between natural hazard risk reduction and e.g. poverty, health, education, economy, Climate Action (SDG_13), inequality. We need to work on these together and not separately.	University	New Zealand	Oceania	Senior Lecturer in Physical Geography
350	The question seems to have a couple of words missing but at a guess "problems" could be one. If so then we have to decide what we mean by understanding. For example does it mean knowledge of their size and frequency, being able to predict them in time and space, being able to search historic records, or being able to separate the study of the events from when they cause problems for people. Perha…			I was brought up in a house that flooded six times in 22 years. Most of them could have been avoided if the road levels had not been raised by about 0.4m. To live in a flood free situation should be part of sustainable development. However, does development have to take place for ever? Are there any limitations to growth? The house I live in at present was built in about 1690 and it is about 2m a…			University	Germany	Western Europe	Allowed
